1 **Transcriptome and Comparative Genomics analyses reveal new functional insights on key**  
2 **determinants of pathogenesis and interbacterial competition in *Pectobacterium* and *Dickeya***  
3 **spp**

4  
5 Daniel Bellieny-Rabelo,<sup>a</sup> Collins K. Tanui,<sup>a</sup> Nikki Miguel,<sup>a</sup> Stanford Kwenda,<sup>a\*</sup> Divine Y.  
6 Shyntum,<sup>a</sup> Lucy N. Moleleki<sup>a,b</sup>

7  
8 <sup>a</sup> Department of Biochemistry, Genetics and Microbiology, University of Pretoria, Pretoria,  
9 Gauteng, South Africa

10 <sup>b</sup> Forestry, Agriculture and Biotechnology Institute, University of Pretoria, Pretoria, Gauteng,  
11 South Africa

12

13 #Address correspondence to [lucy.moleleki@up.ac.za](mailto:lucy.moleleki@up.ac.za)

14

15 \*Present address: Stanford Kwenda - Sydney Brenner Institute for Molecular Bioscience,  
16 University of the Witwatersrand, Johannesburg, Gauteng, South Africa.

17

18 **Running Title**

19 Comparative Genomics and Transcriptomics of *Pectobacterium* and *Dickeya* spp

20

## 21 **Summary**

22 Soft-rot *Enterobacteriaceae* (SRE) typified by *Pectobacterium* and *Dickeya* genera are  
23 phytopathogenic bacteria inflicting soft-rot disease in crops worldwide. By combining  
24 genomic information from 100 SRE with whole-transcriptome datasets, we identified novel  
25 genomic and transcriptional associations amongst key pathogenicity themes in this group.  
26 Comparative genomics revealed solid linkage between the type I secretion system (T1SS)  
27 and the carotovoricin bacteriophage (Ctv) conserved in 96.7% of *Pectobacterium* genomes.  
28 Moreover, their co-activation during infection might indicate a novel functional association  
29 involving T1SS/Ctv. Another bacteriophage-borne genomic region mostly confined in less  
30 than 10% of *Pectobacterium* organisms was found, presumably comprising a novel lineage-  
31 specific prophage in the genus. We also detected the transcriptional co-regulation of a  
32 previously predicted toxin/immunity pair (WHH and SMI1\_KNR4 families) along with type VI  
33 secretion system (T6SS) and *hcp/vgrG* genes suggesting a role in disease development as  
34 T6SS-dependent effectors. Further, we showed that another predicted T6SS-dependent  
35 endonuclease (AHH-family) exhibited toxicity in ectopic expression assays indicating  
36 antibacterial activity. Additionally, we report the striking conservation of group-4-capsule  
37 (GFC) cluster in 100 SRE strains which consistently features adjacently conserved serotype-  
38 specific gene-arrays comprising a previously unknown organization in GFC clusters. Also,  
39 extensive sequence variations found in *gfcA* orthologs suggest a serotype-specific role in the  
40 GfcABCD machinery.

## 41 **Keywords**

42 Genomics; Transcriptome Analysis; *Pectobacterium*; Bacteriophages; Type VI Secretion  
43 Systems; Bacterial Capsules

44 **Mesh Unique IDs:** D023281; D020869; D044043; D001435; D000069376; D016667

45

46

## 47 1. Introduction

48 Conflicts amongst microbes, and against their hosts, unfolds under intense selective  
49 pressure, which have selected an abundant inventory of colonization traits in unicellular  
50 organisms from all domains of life (Alouf, 2003, Aznar *et al.*, 2015, Berg, 1975, Costerton *et*  
51 *al.*, 1999, Gossani *et al.*, 2014, Kubheka *et al.*, 2013). In prokaryotic genomes specifically,  
52 the allocation of gene-inventories is recognized by the frequent conservation within  
53 functionally clustered units. Such pattern is determined by the strong selection imposed over  
54 the organization of prokaryotic genomes (Touchon & Rocha, 2016). The typical  
55 simultaneous occurrence of essential processes, such as transcription, translation and  
56 protein localization in the prokaryotic cytoplasm drives selective pressure on the genome  
57 organization (Esnault *et al.*, 2007). In this scenario, the occurrence of clustered units  
58 constitutes a cohesive solution to facilitate co-transcription of functionally associated genes  
59 (Overbeek *et al.*, 1999, Sabatti *et al.*, 2002, Tamames *et al.*, 1997, Yin *et al.*, 2010). In fact,  
60 this feature has been broadly exploited through guilty-by-association methods in several  
61 studies, enabling the elucidation of novel gene functions (Anantharaman & Aravind, 2003,  
62 Overbeek *et al.*, 1999, Zhang *et al.*, 2011).

63 Bacteria from the *Enterobacteriaceae* family responsible for causing soft rot-blackleg/wilt  
64 disease are collectively designated as Soft-Rot *Enterobacteriaceae* (SRE) which are mainly  
65 represented by *Pectobacterium* and *Dickeya* genera (Pérombelon, 2002). These microbes  
66 have attracted attention for causing great impact on global food-security, as they infect a  
67 considerable range of plant hosts (Marquez-Villavicencio *et al.*, 2011, Pérombelon, 2002).  
68 Hence, roughly one-hundred SRE complete-genome sequencing projects are publicly  
69 available, either completed or currently in progress (Alic *et al.*, 2015, Li *et al.*, 2015, Onkendi  
70 *et al.*, 2016, Panda *et al.*, 2015, Raoul des Essarts *et al.*, 2015). Underpinned by such wealth  
71 of public data, recent transcriptome-based reports have depicted important facets of SRE  
72 biology. For example, the role of small RNAs in the adaptive response of *Pectobacterium*  
73 *atrosepticum* exposed to nutrient-deficient environments, revealing 68 regulated sRNAs in  
74 these conditions, and the discovery of nine novel sRNAs (Kwenda *et al.*, 2016). Also in *P.*

75 *atrosepticum*, the impact on the transcription of 26% of the genome upon deletion of *expl*  
76 revealed the critical role of quorum sensing regulation for disease development (Liu *et al.*,  
77 2008). Similarly, transcriptome analyses demonstrated the impact of 32 isolated stress  
78 conditions, mimicking those found during infection, on *Dickeya dadantii* strain 3937  
79 regulatory patterns, providing a detailed landscape on environmental triggers for gene  
80 expression (Jiang *et al.*, 2016). Furthermore, an investigation on the role played by the *D.*  
81 *dadantii* strain 3937 PecS global regulator during early colonization of leaf tissues uncovered  
82 more than 600 genes in its regulon (Pedron *et al.*, 2017). Thus, as a general rule,  
83 transcriptome-based approaches are powerful means to explore both key strategies utilized  
84 by plant pathogens, and also plants' critical physiological programs, which can potentially  
85 optimize plant genetic enhancement resulting in positive long-term impact on food-security  
86 (Bellieny-Rabelo *et al.*, 2016, Gao *et al.*, 2013, Tanui *et al.*, 2017).

87 The deployment of several exoenzyme-families specialized on breaking plant cell wall is one  
88 of the most conspicuous strategies presented by SRE, hence one of the most exhaustively  
89 investigated (Toth & Birch, 2005). The activity of plant cell wall degrading enzymes  
90 (PCWDE) release byproducts which can be taken up as nutrients by the bacterial cell  
91 (Pérombelon, 2002). Some of these PCWDE include cellulases, pectate lyases (PLs) and  
92 pectin lyases (PNLs) amongst others (Allen *et al.*, 1989, Pérombelon, 2002). Another  
93 important asset for disease development is the ability to biosynthesize high-molecular weight  
94 polysaccharides, which may either be secreted extracellularly (EPS - exopolysaccharide), or  
95 remain attached to the bacterial cell surface (e.g. lipopolysaccharide (LPS) and (CPS)  
96 capsular polysaccharides) (Whitfield, 2006). The expression of horizontally acquired islands  
97 (HAIs) also comprise an ubiquitous strategy to induce pathogenesis and to succeed in  
98 interbacterial competition (Ochman *et al.*, 2000). Genomically integrated bacteriophages  
99 (prophages) and toxins/antitoxins systems frequently exported by bacterial secretion  
100 systems (e.g. Type I, III, VI Secretion Systems) typify pathogenically important HAIs (Durand  
101 *et al.*, 2014, Varani *et al.*, 2013). Specifically, since the discovery of the bacteriophage-like  
102 type VI secretion system (T6SS), it has been implicated as a crucial ecological asset of

103 several Gram-negative bacteria either as a virulence or bacterial-competition agent (Pukatzki  
104 *et al.*, 2006).

105 In this article regions of interest were gleaned by analyzing an original transcriptomic dataset  
106 obtained from *P. carotovorum* subsp. *brasiliense* strain PBR 1692 (henceforth referred to as  
107 *Pcb* 1692) during disease development. The aim was to survey the transcriptional activation  
108 of critical genomic regions required for virulence or interbacterial competition in *Pcb* 1692  
109 and assess their conservation in 100 SRE genomes. We report herein the *in planta* co-  
110 activation of the *carotovoricin* homolog (Ctv) prophage in *Pcb* 1692 along with a T1SS  
111 module immediately upstream. Comparative analysis added support to this evidence by  
112 unveiling an exquisite genomic conservation of the T1SS+Ctv block in 96.7% of all  
113 *Pectobacterium* strains analyzed. These results presumably point to a systemic association  
114 between these two themes in *Pectobacterium* genera, in which T1SS may export Ctv  
115 elements through the periplasm. Extensive gene neighborhood and protein domain-  
116 architecture analyses combined with large-scale sequencing also shed light, for the first  
117 time, to the strong topological and transcriptional association of a previously predicted  
118 toxin/immunity pair (WHH- and SMI1\_KNR4-containing gene-products), to the T6SS  
119 machinery. Further evidence uncovered the up-regulation of ~71% (17 out of 24) of the  
120 genes in a ~25 kb region during the first 24 hours post-infection (hpi) in *Pcb* 1692, which  
121 comprises a highly conserved capsule biosynthesis cluster in SRE. The analyses also  
122 demonstrated that the group 4 capsule (GFC, or G4C) may be the only capsule production  
123 region conserved in *Pcb* 1692. Sequence analyses of gene-products encoded by *gfcA* locus  
124 in a large number of organisms unveiled high sequence variation, suggesting a putative role  
125 in the GFC machinery as a serotype-specific membrane protein.

126

## 127 **2. Results and Discussion**

### 128 **Transcriptome sequencing of *Pcb* 1692 during *in planta* infection**

129 *Pcb* 1692 has been reported as one of the most aggressive *Pectobacterium* species known  
130 to date (Duarte *et al.*, 2004, Durrant, 2016, Marquez-Villavicencio *et al.*, 2011). Aiming to

131 examine the transcriptional landscape of *Pcb* 1692 during infection in potato tubers, a whole-  
132 transcriptome dataset was generated including samples harvested 24 and 72 hpi along with  
133 *in vitro* control (see ‘Experimental Procedures’). The dataset comprises 14 to 20 million  
134 RNA-Seq paired-end reads for each stage, with ~97% of the reads in each sample uniquely  
135 mapped on the reference genome implying good overall quality (Table 1). Subsequent  
136 analyses identified 1743 protein-coding genes (43,5% of total annotated in *Pcb* 1692) under  
137 infection-induced regulation ( $\log_2$ fold-change > 1 or < -1; FDR < 0.01) in the wild-type strain  
138 in at least one time range (Table S2). Importantly, a recent study depicted *D. dadantii*'s  
139 transcriptome during infection on *A. thaliana*, compared at 6 and 24 hpi, being able to detect  
140 13,5% of its protein-coding genes (575 out of 4244) under regulation (up or down) (Pedron  
141 *et al.*, 2017). In the next steps, we take advantage of this recently published gene-  
142 expression experiment featuring a closely related wild-type SRE strain infecting a non-crop  
143 host, to comparatively examine up/down-regulation in our original gene-expression dataset  
144 obtained from *Pcb* 1692.

145 SRE's most well-recognized strategy to accomplish plant tissues invasion involves disruption  
146 of plant cell wall by deploying a variety of pectinase-, cellulase- and protease-related families  
147 (Pérombelon, 2002). PLs and PNL are pectinases that participate in this process by breaking  
148  $\alpha$ -1-4-linkages of homogalacturonan backbone in the pectin molecule via transelimination  
149 mechanism (Carpita & Gibeaut, 1993). The dataset presented here emphasizes the role of  
150 PL in *Pcb* 1692 infection by the significant activation of seven out of eight genes, occurring  
151 simultaneously during the first 24 hpi. This encompasses orthologs of well-documented  
152 genes (*peIABCINZ* – *PCBA\_RS04055;04060;04065;10065;03200;04070*) and one yet  
153 unannotated gene (*PCBA\_RS18630*) (Table S2). These findings are similar to those  
154 detected in *D. dadantii*, in which all nine PLs (*peIABCDEILNZ*) were activated while infecting  
155 *A. thaliana* (Pedron *et al.*, 2017). The pectin lyase gene *pnl* (*PCBA\_RS19200*), which  
156 encodes a major PCWDE (Liu *et al.*, 2008), is massively activated (> 5  $\log_2$ fold-change)  
157 ranking amongst the top 1% most up-regulated genes 24 hpi in *Pcb* 1692 (Table S2). This  
158 finding suggests a specific high transcriptional demand of *pnl* in *Pcb* 1692 during early

159 disease development. Conversely, in *D. dadantii* transcriptome, the *pnl* ortholog  
160 (*Dda3937\_03551*) surprisingly shows no detectable regulation (Table S3) (Pedron *et al.*,  
161 2017). Together these results strengthen the notion of diversity in PCWDE pools  
162 transcriptionally activated by pectinolytic pathogens to surpass various obstacles imposed by  
163 hosts in distinct plant tissues (Toth *et al.*, 2003). Whereas for some PCWDE families (e.g.  
164 PLs) the up-regulation is basal, regardless of host characteristics, other PCWDE families  
165 (e.g. PNL) conversely, are transcriptionally activated under specific host-imposed cues.

166

### 167 **Transcriptional profile and conservation of type VI secretion system and associated** 168 **effectors in SRE**

169 The T6SS is a bacteriophage-like structure that depends on the expression of 13 core genes  
170 (*tss* cluster) to assemble a complex that spans through the cell envelope (Pukatzki *et al.*,  
171 2006). The haemolysin corregulated protein (Hcp) forms a tube that is propelled across the  
172 membranes with a piercing structure on its tip, consisting primarily of two proteins  
173 (VgrG/PAAR), into the target cell (Basler, 2015, Shneider *et al.*, 2013). Furthermore, it has  
174 also been demonstrated that this piercing structure is able to accommodate independent  
175 proteins which function as effectors (Durand *et al.*, 2014). Our dataset underscores the  
176 importance of T6SS with the overwhelming activation of all 13 genes in *tss* cluster (> 3  
177 log<sub>2</sub>fold-change in transcriptional variation during the first 24 hpi). Moreover, a total of four  
178 Hcp-secretion-islands (HSIs), one adjacent to *tss* cluster (HSI-1), and another three in  
179 different genomic contexts (HSI-2, -3 and -4), were also up-regulated in at least one time  
180 point. These HSI exhibit an overall activation of two PAAR-coding and four *vgrG* genes  
181 (Table S4). Comparatively, wild-type *D. dadantii* displays similar up-regulation of most *tss*  
182 and four *hcp* genes out of six conserved in the genome upon infection on *A. thaliana* (Table  
183 S4). However, none of the VgrG- or PAAR-encoding genes (five and three respectively) are  
184 transcriptionally regulated in *D. dadantii* in the same experiment (Pedron *et al.*, 2017).  
185 Notably, the role of VgrG-PAAR as a delivery mechanism for Rhs effectors into target cells is  
186 established in *D. dadantii* facing *in vitro* competition (Koskiniemi *et al.*, 2013). Thus, although

187 structural components of T6SS sheath and tube are similarly regulated when infecting  
188 distant hosts in *Pcb* 1692 and *D. dadantii*, genes encoding the piercing tip components may  
189 be activated under specific cues (Pedron *et al.*, 2017) (Table S3).  
190 Interestingly, the second major HSI in *Pcb* 1692 genome (HSI-2) spans ~6.6 kb harboring  
191 eight genes under positive regulation in at least one time point during infection (Fig. 1A). Of  
192 these, six (excluding only *hcp* and *vgrG*) are uncharacterized/unannotated (Table S4).  
193 Hence, aiming to garner deeper functional insight on this region, we combined analysis of  
194 domain architectures conserved in protein sequences with contextual genomic information  
195 from 100 SRE organisms. Firstly, conserved domains analysis confirmed VgrG  
196 (PCBA\_RS05800; PFAM: PF05954) and PAAR gene-products (PCBA\_RS05770; PFAM:  
197 PF05488) in this region, implying that the cluster is able to source both Hcp-tube, and the  
198 piercing tip (VgrG/PAAR) assembly (Fig. 1B). Further, two uncharacterized genes  
199 (PCBA\_RS05780; PCBA\_RS05785) flanked by the genes encoding VgrG and PAAR caught  
200 our attention for containing respectively SMI1\_KNR4 and WHH (PFAM: PF14414 and  
201 PF09346) domain architectures in their products. Interestingly, the association between the  
202 superfamilies SUKH and HNH/ENDOVI, which encompass SMI1\_KNR4 and WHH families  
203 respectively, has been recognized as a recurrent theme in bacterial genomes (Zhang *et al.*,  
204 2011). This duplet (WHH-SMI1\_KNR4) was described as an immunity/toxin pair associated  
205 with contact-dependent growth inhibition (CDI) systems (e.g. T5SS, T6SS), although  
206 evidence actually linking these genes to the secretion systems remains scarce (Aoki *et al.*,  
207 2010, Hayes *et al.*, 2010, Ruhe *et al.*, 2013, Zhang *et al.*, 2011). The WHH family was  
208 originally identified as a restriction endonuclease highly derived from the HNH domain  
209 (PFAM: PF01844; CL0263) (Shub *et al.*, 1994). Our analyses revealed that members of the  
210 WHH family spread across 18 out of 100 SRE strains. Of these, tight association to  
211 SMI1\_KNR4 family-members immediately downstream in 13 genomes was found, which  
212 corroborates the original report for this duplet (Fig. 1B and Table S4) (Zhang *et al.*, 2011).  
213 Out of the 13 genomes conserving this association (WHH-SMI1\_KNR4) in SRE, one was not  
214 suitable for contextual genomic inspection in this specific region due to incompleteness of



215 genome assembly (namely *P. betavascularum* strain NCPPB 2793). By assessing the  
216 remaining suitable structures conserving WHH-SMI1\_KNR4 duplet, we found 83% (10 out of  
217 12) linkage with upstream HCP, and PAAR-encoding genes mostly downstream (Fig. 1B). A  
218 duplication in the immunity gene encoding the SMI1\_KNR4 was also found in one strain,  
219 which corroborates the original report of this family (Zhang *et al.*, 2011) (Fig. 1B). These  
220 results imply a strong association of this duplet with HSIs in SRE genomes, such as: *Pcbs*  
221 (five strains including *Pcb* 1692), *D. dadantii* (two strains), *D. zea* (one strain), *D.*  
222 *chrysanthemi* (one strain) and *P. betavascularum* (one strain) (Fig. 1B and Table S4). These  
223 observations taken together with the coordinated up-regulation at the transcriptional level of  
224 WHH-SMI1\_KNR4 encoding genes along with all other HSI-2 neighboring elements in *Pcb*  
225 1692 suggest the T6SS-dependent secretion of these genes (Fig. 1). In this context, we  
226 provide the first report of coordinated transcriptional regulation of a SUKH-1/HNH-ENDOVII  
227 system along with the surrounding HSI, in which the WHH-containing gene-product may  
228 work as a T6SS-effector recruited during infection.

229

### 230 **Analysis of antibacterial activity of type VI secretion system related toxins**

231 Aiming to investigate the potential of HSI-borne genes from *Pcb* 1692 to have antibacterial  
232 activity, four relevant genes were cloned into an expression vector and ectopically expressed  
233 in *E. coli*, as described by Koskiniemi *et al.* (2013). To this end, the previously, described  
234 WHH-containing gene (PCBA\_RS05785) was selected alongside three other putative toxins  
235 (PCBA\_RS05775, PCBA\_RS18045 and PCBA\_RS22965) for this analysis. PCBA\_RS05775  
236 belongs to the cell division cycle protein 123 family (D123; Pfam: PF07065), which seems not  
237 to be accompanied by adjacent immunity encoding gene (Table S4). The PCBA\_RS18045  
238 gene is located in HSI-1, within the *Pcb* 1692 *tss* gene cluster and possesses a PAAR domain  
239 followed by an alpha/beta hydrolase fold with a GxSxG catalytic lipase motif (Pfam: PF12697),  
240 characteristic of phospholipases (Alcoforado Diniz *et al.*, 2015). This phospholipase family  
241 member is followed by a putative immunity gene downstream that carries an Ank domain  
242 (Pfam: PF00023). The PCBA\_RS22965 gene has a conserved HNH/EndoVII fold derivative

243 known as AHH (Pfam: PF14412). Similarly to WHH-family members, the AHH proteins were  
244 predicted to be functionally associated with CDI systems in the original report of the family  
245 (Zhang *et al.*, 2011). In most SRE genomes harboring members of the AHH family, no  
246 detectable domain in the downstream immunity protein can be observed (Table S4). In *Pcb*  
247 1692, similarly to six other SRE genomes, a contig break occurs up to five genes prior to this  
248 AHH-member, hindering direct gene neighborhood based conclusions. Nonetheless, in other  
249 strains from *Pcb*, *Pcc* and *Patr* species conserving 70-95% of overall genomic synteny with  
250 *Pcb* 1692 (Fig. S1) the AHH genes are solidly neighbored by *hcp*, *vgrG* and a DcrB domain  
251 (Pfam: PF08786) encoding gene, suggesting a role as a T6SS-associated effector (Table S4).  
252 Such arrangement precisely matches the previously assessed HSI-4 region in *Pcb* 1692 (Fig.  
253 1A). In addition to the original report of AHH family, these results suggest that the AHH  
254 member probably play a role in *Pcb* 1692 infection as a T6SS-associated nuclease

255 The results show that no cell death occurred due to expression of three of the four effectors  
256 between 60 and 240 minutes (Fig. 2A). However, expression of the AHH effector, caused a  
257 reduction in *E. coli* growth, indicating that it has a toxic effect on *E. coli*. This growth inhibition  
258 could be counteracted by co-expression of the toxin and immunity gene (AHH+i) in *E. coli*,  
259 suggesting that the previously observed reduced growth was due to the expression of the AHH  
260 nuclease (Fig. 2B). Thus far, no experimental data exists for the AHH and WHH nucleases,  
261 as well as the D123 protein as T6SS effectors. This is the first experimental work featuring the  
262 antibacterial activity of a AHH-containing protein.

263 Several T6SS effectors targeting eukaryotes, bacteria, or both have been identified thus far  
264 (Jiang *et al.*, 2016, Pukatzki *et al.*, 2007, Russell *et al.*, 2011). Here, we have demonstrated  
265 that one of the four effectors identified have a killing effect on *E. coli* cells. It is possible that,  
266 for the other effectors tested, the *in vitro* conditions used were not conducive for observable  
267 killing. It may also need to be considered that our hypothesis that the T6SS of *Pcb* 1692 is  
268 mainly antibacterial may not be entirely correct. Bernal *et al.* (2018) have noted that thus far,  
269 no plant-targeting effectors have been identified. As the D123 protein has no reported  
270 function and lacks a downstream immunity protein, this protein could be a candidate for a

271 plant-targeted effector. Since some effectors have inter-kingdom activity, it may be  
272 necessary to re-evaluate whether the effectors we have identified as putative antibacterial  
273 effectors may have key functions within the eukaryotic host. This is the first experimental  
274 work featuring the antibacterial activity of a AHH-containing protein. Moreover, it must also  
275 be taken into consideration that T6SS could have functions other than contact-dependent  
276 antibacterial competition which may favour conservation of effectors involved in other  
277 biological programs that will enforce successful host colonization.

278

### 279 **Genomic conservation and transcriptional regulation of prophages during *in planta*** 280 **infection**

281 The impact of HAls originating from prophages in bacterial pathogenic behavior is pervasive  
282 for both plant and animal pathogens (Addy *et al.*, 2012, Reeve & Shaw, 1979, Vaca-  
283 Pacheco *et al.*, 1999). Importantly, selective advantage conferred by prophage-borne genes  
284 to plant-pathogens has been associated with the activity of bacterial secretion systems, as  
285 reported in *Pseudomonas syringae* and *Ralstonia solanacearum* (Genin & Denny, 2012,  
286 Guidot *et al.*, 2007, Varani *et al.*, 2013). In this context, by using a combination of relevant  
287 genome-wide approaches (see 'Experimental Procedures'), we detected two prominent  
288 prophage regions in *Pcb* 1692 exhibiting significant activation at the transcriptional level  
289 during infection (Fig. 3A). The first region encompasses 20 genes in *Pcb* 1692 genome  
290 remarkably up-regulated in the first 24 hpi (Fig. 3A). Moreover 90% of these genes are  
291 syntenic with genomic segments in at least 54/60 *Pectobacterium* strains (Fig. 3B and Table  
292 S5). Interestingly, a genomic segment in *P. carotovorum* subsp. *carotovorum* (*Pcc*) syntenic  
293 to the one found in *Pcb* 1692 was originally described as of prophage origin, regarded as  
294 carotovoricin (Ctv) consisting of 19 genes (Yamada *et al.*, 2006). The report of this  
295 bacteriocin has been recently corroborated by *in silico* analyses in the same species, even  
296 extending the putative range of the cluster to 22 genes in *Pcc* (termed PecaPC1-p2) (Table  
297 S5) (Varani *et al.*, 2013). In this context, we also detected in *P. atrosepticum* (*Patr*) a  
298 segment of 12.7 kb containing 11 gene-products highly similar to Ctv sequences

299 (ECA\_RS18415-18485). Intriguingly, this segment is located within a previously  
300 characterized bacteriophage spanning ~36 kb, designated ECA41 (Evans *et al.*, 2010). In  
301 addition, ECA41 contribution to virulence towards potato hosts was reported, although the  
302 mechanism of putative effectors' action remains unknown (Evans *et al.*, 2010). Curiously,  
303 those three reports describing Ctv, PecaPC1-p2 and ECA41 occurred without knowledge  
304 convergence based on the detectable homology linking the regions in *Patr* and *Pcc*, which  
305 our analyses now reconcile under the same Ctv-homologous root. This preliminary  
306 observation may provide a robust background for future studies on carotovoricin role in  
307 pathogenesis with the combined interpretation of the above-mentioned reports.

308 Furthermore, we observed that Ctv is neighbored by a complete set of T1SS genes in *Pcb*  
309 (*PCBA\_RS08610-08620*) immediately upstream (Fig. 3C and Table S5). In addition,  
310 conserved domains analyses revealed two genes in Ctv cluster containing SLT (PFAM:  
311 PF01464) and Gp37 (PFAM: PF09646) architectures, both reportedly conserved in bacterial  
312 virulence factors (Mushegian *et al.*, 1996, Summer *et al.*, 2004). Therefore, the presence of  
313 predicted effector functionalities in these genes along with a known secretion system  
314 prompted us to assess the degree of conservation of T1SS+Ctv structure. The results  
315 support a remarkable conservation of this genomic architecture, displaying a prominent  
316 block of at least 13 genes (Fig. 3C). This includes (a) two genes comprising a  
317 peptidase/inhibitor pair, (b) three T1SS components and (c) eight Ctv genes, under solid  
318 conservation in 96.7% of *Pectobacterium* genomes (59 out of 61). Importantly, this high  
319 conservation trend seems to occur regardless of the overall synteny between these  
320 genomes (Fig. S1 and Table S5). The T1SS is recognized for its relative simplicity,  
321 composed of three core proteins which form a tunnel-like structure in the inner membrane  
322 enabling molecule transfer from cytosol to the extracellular space fueled by ATP hydrolysis  
323 (Holland *et al.*, 2005). Although typically regarded as signal-independent system, there is a  
324 known group of products exported in a T1SS-dependent manner that contains N-terminal  
325 signals. This group encompasses bacteriocins and microcins (Duquesne *et al.*, 2007a,  
326 Duquesne *et al.*, 2007b, Kanonenberg *et al.*, 2013). Since Ctv constitutes a bacteriocin

327 system, an additional layer of support to the T1SS/Ctv functional association could be added  
328 by searching for signal peptides within Ctv sequences. Given the generally poor  
329 conservation described in T1SS signal peptides, sensitive search setups were carried out  
330 (Emanuelsson *et al.*, 2007, Frank & Sippl, 2008). The predictions from two different methods  
331 corroborate the possible T1SS/Ctv association by the combined detection of N-terminal  
332 signal peptides in five proteins encoded in this region (Supporting Information 1-2). In  
333 addition, some genes lacking known conserved domains, for which the protein sequences  
334 were clustered respectively in the orthologous-groups (see 'Experimental Procedures')  
335 OG\_2978, OG\_2823, and OG\_2853, are conserved in 96-100% of *Pectobacterium* genomes  
336 (Fig. 3C and Table S5). These highly conserved genes in *Pectobacterium* curiously encode  
337 small products (up to 109 aa) and could undertake a role in bacterial competition as small  
338 antimicrobial peptides. Here we unraveled the strikingly dominant theme encompassing  
339 T1SS and Ctv clusters in *Pectobacterium* genomes tied by different evidence sources. This  
340 linkage suggests that either (a) Ctv may comprise an addictive selfish element colonizing  
341 these genomes, or (b) similarly to other reported T1SS/bacteriocins associations, this  
342 system might have been recruited in *Pectobacterium* lineage to export Ctv-borne products  
343 either towards or through the cell membranes.

344 The second prophage, which apparently has not been described thus far, conserves low  
345 similarity with other SRE genomes being mostly confined into *Pcb* strains (henceforth  
346 referred to as PcbPr1) and one *Pcc* strain (Fig. 3B). Blastp searches of PcbPr1 sequences  
347 resulted in five proteins out of 64 (7.8%) returning matches against at least 90 SRE species  
348 (out of 99) (Fig. 3B). In contrast, overall 82.3% of *Pcb* 1692 protein coding sequences (3376  
349 out of 4099) successfully match against at least 90 SRE (Table S6). The low conservation of  
350 PcbPr1 is also observable in terms of genomic organization, as 93.7% of the whole PcbPr1  
351 structure (60 out of 64 genes) conserves synteny with less than 10% of all *Pectobacterium*  
352 genomes analyzed (Fig. 3B and Table S6). Despite the low degree of conservation, PcbPr1  
353 harbors an internal segment spanning 7 kb, in which 88.2% of the genes (15 out of 17) are  
354 cohesively up-regulated over the first 72 hpi (Fig. 3A and Table S6). Importantly, 12 out of 17

355 genes in this region encode proteins for which known conserved domains could not be  
356 detected. In addition, most of these gene products were clustered in small orthologous  
357 groups with sequences from other *Pcb* and *Pcc* implying lineage-specific origin (Fig. 3A).  
358 This observation supports the previous synteny analysis, reinforcing the possibility of PcbPr1  
359 comprising a lineage-specific insertion in *Pcb* and *Pcc*. Notably, genomic conservation of  
360 functional lineage-specific prophages is observable in both animal and plant pathogens as  
361 typified respectively in studies using *E. coli* and *R. solanacearum* (Gabriel *et al.*, 2006,  
362 Guidot *et al.*, 2009, Perna *et al.*, 2001). Interestingly, it has been reported that two HAIs in *R.*  
363 *solanacearum*, namely *Rasop1* and *Rasop2*, showed no similarity with other phages  
364 previously sequenced in the species (Varani *et al.*, 2013). In order to assess gene  
365 expression patterns of *Rasop1/2* during infection, we gleaned data from an existing whole-  
366 transcriptome experiment (Jacobs *et al.*, 2012). Up-regulation of 58.6% and 62.5% of  
367 *Rasop1* (27 out of 46) and *Rasop2* (20 out of 32) genes was detected upon infection on  
368 tomatoes (Table S3) (Jacobs *et al.*, 2012). The evidence presented underscores lineage-  
369 specific insertions conservation as an important strategy for some organisms, probably  
370 providing competitive advantage against close species not bearing the same traits.  
371 Therefore, PcbPr1 conservation and up-regulation during infection might have implications  
372 on *Pcb* 1692 success when facing *in planta* competition against other *Pectobacterium spp.*  
373 As one of the few relatively large lineage-specific genomic regions compared to other  
374 *Pectobacterium spp.*, we speculate that PcbPr1 could be a key asset for the reported high  
375 level of virulence observed in *Pcb*.

376

### 377 **Characterization of dedicated polysaccharide-biosynthetic clusters**

378 The composition of serotype-specific polysaccharide gene clusters gives rise to biochemical  
379 diversity in bacterial cell-surfaces (Schmid *et al.*, 2015). The fundamental role of cell surface  
380 in virulence has been well established in both animal and plant pathogens (Barras *et al.*,  
381 1994, Kao & Sequeira, 1991, Rocchetta *et al.*, 1999, Whitfield, 2006). In SRE, however,  
382 aside from the establishment of *E. coli rffG* homolog in *P. atrosepticum* as a probable player

383 in enterobacterial common antigen biosynthesis (Toth *et al.*, 1999), the overall knowledge on  
384 this subject remains limited. In this context, our dataset enabled detection of a 25 kb region  
385 in *Pcb* 1692 functionally associated with polysaccharide biosynthesis exhibiting significant  
386 co-activation of 17 out of 24 genes in the first 24 hpi (Fig. 4A). Through orthology-based  
387 annotation of *Pcb* 1692 genes compared with model organisms (see 'Experimental  
388 Procedures'), and subsequent integration with STRING correlational database (von Mering  
389 *et al.*, 2005), most of the gene-products were annotated into the LPS biosynthetic pathway  
390 (Fig. 4B and Table S7). Out of the remaining eight unannotated entries, seven were  
391 successfully characterized by conserved domains inspection through HMM-profiles (Eddy,  
392 2009, Finn *et al.*, 2010). Thus, additionally revealing well-known domains in polysaccharide-  
393 production such as: an integral membrane polysaccharide-specific transporter (PST; PFAM:  
394 PF14667), an acetyltransferase (AT; PFAM: PF13302), a cupin-like protein (PFAM:  
395 PF05523), and four glycosyltransferases (GT; PFAM Clans: CL0110; CL0111) (Fig. 4A and  
396 Table S7). The remaining unannotated gene (*PCBA\_RS09180*) is related to *gfcA/yjbE*  
397 (Ferrieres *et al.*, 2007, Peleg *et al.*, 2005) described in *E. coli* and will be discussed in detail  
398 in the next section. As a general rule all these eight entries unsurprisingly display high  
399 sequence variation mostly comprising weakly conserved blocks amongst SRE (Fig. 4A).  
400 These lineage-specific genes presumably comprise a serotype-specific block in SRE  
401 polysaccharide biosynthesis.

402 Next, by integrating our annotations with STRING networks, we observed new co-expression  
403 (coordinately up-regulated in our dataset) associations between *Pcb* 1692 orthologs during  
404 the course of infection (Fig. 4B and Table S7). The co-expression linking several genes  
405 encoding GTs and modification enzymes (e.g. *rhIC*, *rfbA*, *glf*, and *wbpE*) in our dataset were  
406 undetected in STRING, possibly indicating an uncommon genomic architecture in *Pcb* 1692  
407 to be detailed below (Fig. 4B). Some other associations are surprisingly novel, such as those  
408 amongst *gfcBCD* and *wza/wzc* genes, all reportedly participants of capsule biosynthesis  
409 (Drummelsmith & Whitfield, 1999, Peleg *et al.*, 2005) (Fig. 4B). In this regard, functional  
410 studies have attributed to Wza/Wzc the assembly of a transmembrane complex spanning

411 the entire periplasm required for capsule assembly (Collins *et al.*, 2007). As for *gfcABCD*,  
412 although the exact functions remain unknown, these genes are regarded as the typifying  
413 theme of group 4 capsule production clusters (Peleg *et al.*, 2005, Rendueles *et al.*, 2017,  
414 Whitfield, 2006). Therefore, the presence of *wza-b-c* and *gfc* orthologs indicates that *Pcb*  
415 1692 possesses, and significantly activates during infection, the genetic apparatus to  
416 produce GFC (Fig. 4B and Table S7).

417 It is noteworthy that a recently proposed model for programmatic large-scale identification of  
418 GFC operons based on *E. coli* did not include internal serotype-specific genes (Rendueles *et*  
419 *al.*, 2017). Indeed, a typical GFC operon in *E. coli* carries the *gfc* genes immediately  
420 upstream of *wza-b-c* paralogs (i.e. *gfcE*, *etp*, and *etk*) with no adjacent serotype-specific  
421 genes. However, our report supports the presence of lineage-specific genes flanked by *wza-*  
422 *b-c* and *gfcBCD* in *Pcb* 1692 for which transcriptional up-regulation is required upon  
423 infection, potentially representing a serotype-specific block (Fig. 4A). Moreover, the  
424 presence of lowly conserved gene organizations upstream of *gfc* genes seems to be a  
425 general feature in SRE genomes as depicted by extensive gene neighborhood analysis (Fig.  
426 S2 and Table S7). These blocks in SRE may vary from 13 to 27 genes harboring diverse  
427 family-compositions consistently flanked by *wza-b-c* upstream and *gfcBCD* downstream.  
428 Although blocks ranging from 16 to 20 serotype-specific genes seem to be preferred across  
429 SRE genomes, there is no direct association between any particular species and specific  
430 block sizes (Fig. S2 and Table S7). This 'unusual' organization of the GFC lineage-specific  
431 region in SRE compared to the one in *E. coli* might explain why some co-expression  
432 associations (e.g. *gnd* and *rhIC*) in our dataset were not present in STRING database as  
433 mentioned above (Fig. 4B). The possible functional implications of SRE and specially *Pcb*  
434 1692 harboring this lineage-specific gene-array flanked by *wza-b-c* and *gfcABCD* will be  
435 discussed in detail in another section.

436 Importantly, a recent study predicted that 40% of the bacterial lineages analyzed conserve  
437 more than one capsule system (Rendueles *et al.*, 2017). This observation prompted us to  
438 systematically survey *Pcb* 1692 genome for other possible capsule regions occurrences.



439 Since LPS, EPS and capsules share many gene families in their functional units, which  
440 greatly hinders fully automatic predictions, the regions in *Pcb* 1692 genome were manually  
441 inspected following an initial automatic screening (see 'Experimental Procedures'). The  
442 analysis allowed additional detection of two conspicuous polysaccharide clusters in *Pcb*  
443 1692, although neither of these regions conserve characteristic domains that typify capsule-  
444 related regions (Table S7). Thus, these findings indicate that GFC may be the only capsule  
445 group produced in *Pcb* 1692. Nonetheless, these two additional regions carry respectively  
446 eight and seven *waa* and *wec* orthologs, which are commonly associated with LPS  
447 biosynthesis, and could be important assets during infection and therefore worth  
448 investigating (Lehrer *et al.*, 2007, Regue *et al.*, 2001). By analyzing their transcriptional  
449 patterns, an increased demand for GFC and *wec* genes transcription in the first 24 hpi was  
450 observed. Contrarily, in the *waa* region, only three out of 16 genes were up-regulated (Fig.  
451 4C). Further, significant down-regulation of two genes (*waaF* and *hldD*), and three borderline  
452 predictions of down-regulation (*waaG*, *waaQ*, and *waaC*; Table S7) indicated a general low  
453 demand for transcription of the *waa* region during infection. Curiously, between 24-72 hpi a  
454 slight negative transcriptional modulation occurs in most of the genes in the three regions,  
455 however it does not significantly impact the overall trend for up-regulated genes (Fig. 4C).  
456 Unlike GFC or *waa* gene clusters, the *wec* region is remarkably conserved in nearly all SRE,  
457 encompassing six (out of 11) genes displaying infection-induced up-regulation in *Pcb* 1692  
458 (Fig. 4C). These observations elucidate the unequal transcriptional demand for three distinct  
459 polysaccharide clusters during infection of potato by *Pcb* 1692. While *wec* and specially *gfc*  
460 gene clusters seem to be consistently recruited at the transcriptional level, the transcription  
461 profile of the *waa* cluster is mostly flat, suggesting different functional demands during  
462 infection for these regions.

463

#### 464 **Analysis of *gfcA*-related sequences and genomic contexts**

465 The inability to assess either orthology or domain conservation for PCBA\_RS09180, in  
466 addition to the current lack of information regarding the *gfcA* function prompted an in-depth

467 comparative investigation into this locus. Based on results presented above, 88% of the SRE  
468 analyzed genomes carry ‘orphan’ (not-clustered by OrthoMCL) genes upstream of *gfcBCD*  
469 (Table S7). In the remaining 22% strains, we detected gene products from small clusters  
470 populated with sequences from three (OG\_5444: *D. solani*, *D. dadantii* and *D.*  
471 *chrysanthemi*), two (OG\_10199: *D. solani*, and *D. chrysanthemi*), and one (OG\_7594: *D.*  
472 *dianthicola*) species (Table S7). This clustering pattern in groups populated by a small  
473 number of species imply lineage-specific expansions. Furthermore, overall only 10% of SRE  
474 strains carry the YjbE domain (PFAM: PF11106) described in *E. coli* (Table S7). These  
475 include the two *P. betavasculorum* analyzed and six out of seven *P. atrosepitum* strains in  
476 the analysis. Hence, the presence of some PCBA\_RS09180-related sequences in small  
477 clusters represented by no more than three species (e.g. OG\_5444 and OG\_7594) due to  
478 high level of sequence variation, constitutes a typical serotype-specific pattern.

479 Next, in order to test these results in a broader scope we expanded the gene neighborhood  
480 analysis beyond of the SRE group. Sequence-based searches were performed in order to  
481 retrieve a set of PCBA\_RS09180-related proteins in bacteria. Unsurprisingly, Blastp  
482 (Altschul *et al.*, 1990) search using PCBA\_RS09180 sequence against NCBI (non-redundant  
483 protein database) was ineffective. In a preliminary level, this is consistent with the  
484 observations found in SRE, that showed high sequence variation in PCBA\_RS09180-related  
485 sequences. We then utilized a more sensitive approach (Remmert *et al.*, 2011) to obtain  
486 distantly related PCBA\_RS09180 proteins. Within 50 positive matches, 27 were supported  
487 by publicly available genome-wide data, hence suitable for gene neighborhood screening  
488 (Table S7). From these, three encode YjbE-containing products (PFAM: PF11106)  
489 corroborating the relationship between *PCBA\_RS09180* and *yjbE/gfcA*. On the other hand,  
490 the remaining 24 gene-products display no detectable domain (similarly to PCBA\_RS09180).  
491 The results revealed that even in evolutionary distant organisms, 91% (22 out of 24) of the  
492 PCBA\_RS09180 distantly related encoding genes are confined upstream of *gfc/yjb-*  
493 homologous operons (Table S7). Thus, although this locus has been termed *yjbE/gfcA* and  
494 the respective domain described in *E. coli* assigned as YjbE, this locus is in fact highly

495 variable and the YjbE domain is weakly represented. An additional confirmation was  
496 obtained by consulting a large repository for domain architectures annotation (Geer *et al.*,  
497 2002). The presence of the YjbE domain in bacteria is at least 20-fold less frequent  
498 compared to YjbF, YjbH and Caps\_synth\_GfcC (Table S7). Together these results uncover  
499 the highly variable nature of the *gfcA* locus in a broad range of prokaryotes, which could be a  
500 serotype-specific player in the capsule biosynthesis machinery.

501 Next, the *gfcA* encoded products from 100 SRE strains were aligned in order to assess  
502 possible conserved residues in their sequences. The results revealed a conspicuously  
503 conserved N-terminal segment harboring a MKKTLxxLxxxxAxxxxxxA motif (Fig. S3).

504 Further, we conducted predictions for secondary structure of PCBA\_RS09180 sequence in  
505 comparison to GfcA and YjbE using two different methods (Hofmann, 1993, Moller *et al.*,  
506 2001). Together, the analyses cohesively show two possible transmembrane sections in  
507 both PCBA\_RS09180 and GfcA with apparent cytoplasmic orientation of N-terminal region  
508 (Fig. S4). Conversely, secondary-structure predictions for YjbE were inconclusive. Also, the  
509 prediction of N-terminal signal-peptide (Emanuelsson *et al.*, 2007, Frank & Sippl, 2008) in  
510 PCBA\_RS09180 and GfcA also strengthens the possibility of shared functionality  
511 (Supporting Information 3). In addition, it indicates closer functional relationship between  
512 PCBA\_RS09180 and GfcA, compared to YjbE. Strikingly, further extensive signal peptide  
513 predictions made by two different methods in 100 *gfcA* sequences from SRE also returned  
514 96% overlapping positive results in N-terminal regions (Supporting Information 4). This result  
515 matches the conserved region found in the previous alignment, reinforcing their functional  
516 conservation (Fig. S3). Moreover, secondary structure predictions in the same set of  
517 sequences supported that 80% of *gfcA* orthologs may conserve between one and three  
518 transmembrane regions, which is in accordance with the results from GfcA (Supporting  
519 Information 5). Together these results suggest that PCBA\_RS09180, and presumably SRE  
520 orthologs, could be directed to the inner-membrane (similarly to GfcA) to function as  
521 membrane proteins. This corroborates the current hypothesis on GfcABCD performing

522 auxiliary role in polysaccharide translocation across the membranes (Sathiyamoorthy *et al.*,  
523 2011).

524

### 525 **Analysis of GFC elements and Wza/Wzc system organization in *Pcb* 1692**

526 The currently accepted model for polysaccharide biosynthesis via Wza/Wzc transmembrane  
527 conduit involves association of several functional modules such as: (i) a series of peripheral  
528 GTs and sugar-modification enzymes, (ii) a Wzx-like (PST family) transmembrane flipping  
529 protein, (iii) an initiation sugar transferase, and (iv) a Wzy-like polymerase (Whitfield, 2006).

530 The Wza/Wzc system is often associated with two highly similar systems that produce  
531 respectively group 1 and 4 capsules (Whitfield, 2006). Curiously, the gene arrangement in  
532 SRE's GFC region resembles the one from group 1 capsule described in other species  
533 carrying a serotype-specific block downstream of *wza-b-c* (Fig. S2) (Rahn & Whitfield, 2003).

534 Nonetheless, the genome-wide absence of the group 1 capsule-characteristic *wzi* gene  
535 suggests it could not be produced in the vast majority of SRE species, except for *P.*

536 *betavascolorum*, and *P. carotovorum* subsp. *actinidiae* (Table S7). In this context, the results  
537 in *Pcb* 1692 were examined in the light of comparative analyses with SRE and then

538 superimposed to the canonical Wza/Wzc model in order to propose a possible organization  
539 for the GFC machinery in *Pcb*. A total of eight GTs or modification enzymes, predicted as  
540 soluble or weakly attached to the inner membrane, encoded in this region exhibit cohesive  
541 up-regulation in the first 24 hpi in *Pcb* 1692 (Fig. 5). These enzymes exhibit 0-2

542 transmembrane (TM) sections, which is in accordance with the Wza/Wzc functional model  
543 (Fig. 5; Supporting Information 7 and Fig. S5). Next, the conserved PST within the GFC

544 region presents 12 TM helices, which is described as the consensus number of TM sections  
545 for Wzx-like flippases (Islam & Lam, 2013). Also, the functional domain detected in this

546 sequence is classified in the same Pfam clan (CL0222) which also encompasses the domain  
547 found in the canonical Wzx (Pfam: PF01943). Further, in *Pcb* 1692, the Glycos\_transf\_4

548 (PFAM: PF00953) domain found in the WbpL ortholog (PCBA\_RS09080) is also conserved  
549 in WbaP/WecA sequences, which are the reported initiation transferase linked to Wzc in

550 other bacteria (Table S7) (Valvano, 2003, Wang *et al.*, 1996). This WbpL ortholog also  
551 features 11 TM helices solidly predicted, which matches the exact number found in WecA  
552 from *E. coli* (Fig. 5; Supporting Information 7 and Fig. S5). As for the Wzy-like activity,  
553 however, the direct association to this *Pcb* 1692 region is unclear. The WzyE activity in *E.*  
554 *coli* is described as similar to those performed by members of GT-B subfamily (Islam & Lam,  
555 2014, Zhao *et al.*, 2014). However, GT-B is the only unrepresented GT subfamily within the  
556 described GFC region in *Pcb* 1692. Interestingly, a GT-C found within the *Pcb* 1692 GFC  
557 region conserves 10 TM helices, matching the number found in *Pcb*'s direct ortholog of  
558 WzyE (PCBA\_RS14975). The presence of periplasmic loops could also be predicted in this  
559 GT-C member, consistent to previously described Wzy proteins (Fig. 5 and Supporting  
560 Information 7) (Daniels *et al.*, 1998, Kim *et al.*, 2010).

561 By inspecting outer-membrane (OM) propensity (see 'Experimental Procedures') in  
562 sequences from the GFC region, only GfcD and Wza returned positive results (Supporting  
563 Information 6). This opens a question on the GfcB localization, which is generally regarded  
564 as an OM protein, but surprisingly could not be predicted as one (Fig. 5) (Zhou *et al.*, 2006).  
565 The only structurally resolved encoded product from the *gfc* operon currently published is the  
566 GfcC, which is hypothesized to be a periplasmic protein (Sathiyamoorthy *et al.*, 2011).  
567 Together the results presented here show that *Pcb* 1692 conserves canonical elements of  
568 Wza/Wzc system (i.e. *wzx/wzy*, and *wecA*) separated from the GFC region, which could  
569 support their encoded products as putative participants in the machinery. Additionally,  
570 evidence also indicates that PST, GT-4, and WbpL proteins encoded within the serotype-  
571 specific block of GFC region remarkably mimics structural features respectively found in  
572 Wzx, Wzy, and WecA, suggesting they could also undertake similar roles in the *wza/wzc*  
573 system (Fig. 5). Combined, these analyses expand the current view over GFC region gene-  
574 organization by applying extensive contextual comparison amongst SRE genomes, domain  
575 analysis and membrane topology predictions. The presence of serotype-specific blocks  
576 flanked by *wza-b-c* and *gfc* genes in SRE sheds light on a novel genomic architecture that

577 combines the known pattern from group 1 capsule regions with typical genes involved group  
578 4 capsule biosynthesis.

579

### 580 **3. Concluding Remarks**

581 In this article we presented an integrative approach that takes advantage of extensive public  
582 information to produce a reliable background for genome-wide studies in SREs organisms,  
583 including 100 strains from *Pectobacterium* and *Dickeya* genera. By combining this platform  
584 with an original transcriptome dataset, we shed light on strong genomic associations  
585 amongst virulence and interbacterial competition determinants in the SRE group, supported  
586 by coordinated transcriptional up-regulation of these elements in *Pcb* 1692 throughout  
587 disease development in potato tubers. Collectively, these findings provide strong evidence  
588 for gene associations and/or infection-induced transcriptional demand within important  
589 pathogenicity themes including PCWDE, T6SS, Ctv and the capsule biosynthesis  
590 machinery, which may pave the way for biotechnological applications in the near future.

591

592

## 593 **4. Experimental Procedures**

### 594 **Culture media, growth conditions and total RNA extraction**

595 Wild type *Pcb* 1692 strain were grown on nutrient plate at 37°C for 16 hours. Overnight  
596 cultures were prepared by inoculating a single colony into 10 ml Luria-Bertani (LB) broth at  
597 37 °C for 16 hours with constant shaking at 200 rpm. To obtain potato inoculated *Pcb* 1692  
598 cells, healthy potato tubers (*Solanum tuberosum* cv. Mondial) were inoculated with *Pcb* 1692  
599 (OD<sub>600</sub> = 1) wild type strain as previously described in (Moleleki *et al.*, 2017). The  
600 experiments were performed using three biological replicates, with three tubers per replicate.  
601 Macerated potato tissue was scooped out at 24 and 72 hpi and homogenized in double  
602 distilled water. Bacterial cells were recovered by grinding the scooped macerated potato  
603 tissues in 20 ml of double distilled water using autoclaved pestle and mortar. Starch material  
604 was removed by centrifuging ground tissue at 10000 rpm for 1 minute. Potato-inoculated and  
605 *in vitro* cultured bacterial cells were stabilized using the RNAprotect® reagent (Qiagen, USA)  
606 according to manufacturer's instructions. Total RNA from *in vitro* grown and potato-  
607 inoculated bacteria was extracted as previously described using the RNeasy mini kit  
608 (Qiagen, Hilden, Germany).

609

### 610 **Total RNA quality and cDNA library construction**

611 The concentration and purity of each extracted total RNA sample was evaluated using  
612 spectrophotometric analysis (NanoDrop® ND-1000; NanoDrop® technologies, Wilmington,  
613 DE) at a ratio of 230/260 nm. Using the Agilent 2100 Bioanalyzer (Agilent Technologies,  
614 Inc.), total RNA samples' concentration, RIN and 28S/18S ratio were determined. 200 ng  
615 aliquots of total RNA from *Pcb* 1692 extracted from *in vitro* grown cells (16 h) and infected  
616 potato tubers at 24 and 72 hpi was used to prepare cDNA libraries. The Illumina sequencing  
617 service was provided by the BGI Co., Ltd (China). TruSeq RNA Sample Prep Kit v2  
618 (Illumina, USA) was used to construct the cDNA libraries following the manufacturer's  
619 protocol. In summary, the mRNA was cleaved into small fragments, followed by the  
620 synthesis of first-strand cDNA with random hexamer-primed reverse transcription. RNase H

621 and DNA polymerase I were used to synthesize second-strand cDNA. The double-stranded  
622 cDNA was subjected to terminal modification, by addition of adenosine and ligated with  
623 adapters. Adaptor-ligated fragments with suitable sizes were selected and enriched by PCR  
624 using the PureLink™ PCR Purification Kit (Invitrogen, USA) to create the cDNA libraries for  
625 sequencing. The paired-end sequencing (PE91) was performed on the Illumina HiSeq 2000  
626 sequencing platform. The data have been deposited in NCBI's Gene Expression Omnibus  
627 (GEO) and are accessible through the GEO accession number, GSE102557.

628

### 629 **Reads mapping, gene expression and statistical analysis**

630 Quality assessment of the raw data was performed by fastqc software  
631 (<https://www.bioinformatics.babraham.ac.uk/projects/fastqc>), then low quality regions were  
632 trimmed by Trimmomatic v 0.36 (Bolger *et al.*, 2014). The trimmed RNA-Seq reads were  
633 mapped to the *Pcb* 1692 reference genome (GCF\_000173135.1) using hisat2 v 2.1.0 (Kim *et*  
634 *al.*, 2015). Raw read-counts were performed in R environment (<https://www.r-project.org/>) by  
635 the *featureCounts* package (Liao *et al.*, 2014) and subsequent statistical analysis of differential  
636 expression by edgeR package (Robinson *et al.*, 2010). The threshold parameters used to  
637 assign differential expression were FDR < 0.01 (Benjamini & Yekutieli, 2005), and absolute  
638 log<sub>2</sub>fold-change > 1 (up-regulated), or log<sub>2</sub>fold-change < -1 (down-regulated). Genes'  
639 transcriptional profiles were graphically rendered by Gitools (Perez-Llamas & Lopez-Bigas,  
640 2011).

641

### 642 **Orthology analysis, domain architectures detection, and gene neighborhood** 643 **screenings**

644 Orthology relationship between protein sequences was assessed using the OrthoMCL  
645 pipeline (Li *et al.*, 2003), which takes tabular results from a Blastp search under specific  
646 parameters (options: -seg yes -outfmt 6 -num\_threads 3 -num\_alignments 100000 -evaluate  
647 1e-05) as input. The sequences are clustered in orthologous groups labeled with "OG"  
648 numeric tags (e.g. OG\_1; OG\_2). OrthoMCL was performed with MCL granularity of 1.5. In



649 parallel, all sequences were characterized by using HMMER3 (Eddy, 2011) supported by  
650 Pfam-A database (Finn *et al.*, 2010) in order to generate in-house predictions of conserved  
651 domain architectures through Hidden Markov Models (HMM) profiles (Baum & Petrie, 1966).  
652 Orthology and domain architecture information are then combined with genomic coordinates  
653 from each genome by custom Perl scripts in order to generate annotated gene neighborhood  
654 screenings.

655

### 656 **Ectopic expression of predicted T6SS-dependent toxins**

657 Removal of Rat FABP1 gene from pTrc99A (AddGene) removed some cut sites from the MCS.  
658 *KpnI* and *BamHI* cut sites were reintroduced into the plasmid by incorporation of the cut sites  
659 into the 5' region of the PCR primers (H5907\_F/R) (Table S8). PCR amplification of  
660 *PCBA\_RS05790* (hypothetical protein upstream of WHH-containing nuclease) incorporated  
661 *XbaI*, *KpnI*, and *BamHI* upstream of the ORF and *BamHI* and *SalI* downstream of the ORF.  
662 The PCR product was subcloned into pJET1.2/blunt and excised with *XbaI/SalI* restriction  
663 digest. pTrc99A (without rat FABP1) was digested with *XbaI/SalI* and ligated with the excised  
664 PCR product. The gene was removed using *BamHI* digest and the linear plasmid re-ligated.  
665 In this manner *BamHI* and *KpnI* were reintroduced into the MCS to facilitate cloning of effector  
666 genes. The resulting plasmid is referred to as pTrc100 as its MCS differs slightly from pTrc99A,  
667 but the rest of the plasmid remains unchanged.

668 Effector genes (*PCBA\_RS05785*: WHH-containing nuclease, *SacI/PstI*; *PCBA\_RS05775*:  
669 D123-containing protein, *KpnI/PstI* digest; *PCBA\_RS18045*: phospholipase, *SacI/PstI* digest;  
670 and *PCBA\_RS22965*: AHH-containing nuclease, *SacI/PstI* digest) were ligated into arabinose-  
671 inducible expression plasmid pCH450; immunity genes (*PCBA\_RS22965*; AHHi; *KpnI/PstI*  
672 digest) were ligated into IPTG-inducible pTrc100, and respectively transformed into *E. coli*  
673 DH5-alpha. Overnight cultures were grown in 0.1% glucose to repress expression from the  
674 arabinose-inducible promoter. Cultures were washed in 10 mM MgSO<sub>4</sub>, adjusted to an OD<sub>600</sub>  
675 of 0.05 in fresh LB broth supplemented with 5 µg/ml tetracycline, 50 µg/ml ampicillin, and 1  
676 mM IPTG, as required. After 30 minutes, expression from pCH450 was induced with 0.2% L-

677 arabinose. Where necessary, expression from pTrc100 with IPTG was induced immediately.  
678 Optical density (600 nm) was measured hourly.

679

### 680 **Collinearity analysis, prophage-origin predictions and capsule regions inspection**

681 In order to predict collinear conservation in SRE genomes, we first obtained genomic  
682 annotation and protein sequence data from all *Pectobacterium* and *Dickeya* strains available  
683 on RefSeq database (<https://www.ncbi.nlm.nih.gov/refseq>) (Table S9) until December/2017,  
684 totaling 100 strains including *Pcb 1692*. We then performed the synteny analysis using  
685 MCScanX (Wang *et al.*, 2012) allowing minimum match size of two genes to call syntenic  
686 blocks (option: -s 2). MCScanX takes the tabular results of a non-stringent Blastp search  
687 (Altschul *et al.*, 1990) as input (option: -evaluate 1). Total number of positive matches of gene-  
688 products (from one organism) against all other SRE protein datasets resulting from both  
689 Blastp and MCScanX were parsed by in-house Perl scripts (<https://www.perl.org/>). Graphical  
690 ideograms were scripted in Circos (Krzywinski *et al.*, 2009) compiling syntenic regions in the  
691 genomes as ribbon-links between chromosomes, as well as Blastp and MCScanX hit counts  
692 from pairwise comparisons previously described. Prophage-origin predictions were  
693 conducted by using PhiSpy software (Akhter *et al.*, 2012), in parallel with Blastp search  
694 support (options: -qcov\_hsp\_perc 40 -evaluate 1e-05) against a Phantome  
695 (<http://www.phantome.org>), Phast (Zhou *et al.*, 2011) and NCBI bacteriophage-sequence  
696 databases. In parallel we have performed genome-wide synteny predictions on *Pcb 1692*  
697 and *Pcc* strain BCS2 using recently predicted prophage regions published by Varani *et al.*  
698 (2013). The capsule regions were initially surveyed using HMM-profile search (Eddy, 1998)  
699 based on the curated database of capsule-related domains made public by Rendueles *et al.*  
700 (2017). Next, the *Pcb 1692* genome was programmatically scanned for segments harboring  
701 at least three consecutive matches carrying the above-mentioned capsule-related domains  
702 with two non-matches gap allowed for greater sensitivity. These segments were then  
703 manually inspected in an effort to identify detectable functionality in the adjacent genes that  
704 could support the existence of a capsule region.

705

706 **Sequence search, alignment and membrane topology predictions of GfcA-related**  
707 **entries**

708 The PCBA\_RS09180-related sequences were obtained using HHblits online tool by default  
709 parameters (Remmert *et al.*, 2011). HHblits positive hits were filtered by at least 40 matched  
710 amino-acid columns in HMM-HMM alignment, representing ~40% of the query  
711 (PCBA\_RS09180) sequence (Table S7). Next all above-threshold entries were retrieved.  
712 Out of 50 above-threshold entries, 27 were supported by publicly available genome-wide  
713 data, making them suitable for gene neighborhood screening. Genomic data for these 27  
714 structures (complete genome/scaffold/contig) were then obtained from RefSeq database for  
715 gene neighborhood screening. CDART database were inspected in order to obtain extensive  
716 representativeness of YjbE, YjbF, Caps\_synth\_GfcC, and YjbH (PFAM: PF11106, PF11102,  
717 PF06251, PF06082). (Geer *et al.*, 2002). Sequence alignments were performed using  
718 Clustal Omega (Sievers & Higgins, 2018). Prediction of transmembrane segments were  
719 conducted by using TMpred (Hofmann, 1993) and TMHMM (Moller *et al.*, 2001) online  
720 servers in parallel. Signal peptides were predicted by SignalP 4.1 server (Emanuelsson *et*  
721 *al.*, 2007) and Signal-Blast (Frank & Sippl, 2008). Detection of putative outer-membrane  
722 proteins was conducted by using HHomp (Remmert *et al.*, 2009).

723

724 **STRING network integration**

725 In order to integrate *Pcb* 1692 with STRING database (von Mering *et al.*, 2005), orthology  
726 annotations with *Escherichia coli* strain K-12 and *Pseudomonas aeruginosa* strain PAO1  
727 were used. The *Pcb* 1692 entries conserving orthology with the model organisms were  
728 supplied to STRING correlational database. This provided association between annotated  
729 orthologs with the respective Gene Ontology (GO) terms (Carbon *et al.*, 2009) for each  
730 sequence.

731

732 **5. Acknowledgements**

733 This research study was funded by the National Research Foundation (NRF), South Africa  
734 through Competitive Funding for Rated Researchers (CFRR 98993); NRF Bioinformatics  
735 and Functional Genomics (BFG 93685) and NRF Research Technology and Transfer Fund  
736 (RTF) 98654. DYS NRF BFG Post-Doctoral Fellowship, DB-R University of Pretoria Post-  
737 Doctoral Fellowship. CKT PhD Bursary was funded by the University of Pretoria Bursary.  
738 Any opinion, findings, conclusions or recommendations expressed in this material is that of  
739 the author(s) and the NRF does not accept any liability in this regard.

740

741 **6. Author Contributions**

742 Conception or design of the study: D.B.-R., C.K.T.; and L.N.M.; Acquisition, analysis, or  
743 interpretation of the data: D.B.-R., C.K.T.; N.M., D.Y.S., S.K., and L.N.M.; Wrote the  
744 manuscript: D.B.-R., N.M., and L.N.M.

745

## 766 **7. Abbreviated Summary**

767 Through large-scale gene expression obtained from *Pcb* 1692 and comparative genomics  
768 using 100 *Pectobacterium* and *Dickeya spp* this report uncovers association amongst key  
769 pathogenicity themes in the main Soft-Rot *Enterobacteriaceae* taxa. The approach enabled  
770 identification of striking transcriptional and contextual genomic association between: (i) the  
771 WHH/SMI1\_KNR4 toxin/immunity pair with type VI secretion system, (ii) the carotovoricin  
772 prophage with type I secretion system, and (iii) a serotype-specific block ranging 13-27  
773 genes with characteristic group-4-capsule genes.

774

## 775 **8. References**

- 776 Addy H.S., Askora A., Kawasaki T., Fujie M. & Yamada T. (2012). The filamentous phage  
777  $\phi$ RSS1 enhances virulence of phytopathogenic *Ralstonia solanacearum* on tomato.  
778 *Phytopathology* **102**: 244-251.
- 779 Akhter S., Aziz R.K. & Edwards R.A. (2012). PhiSpy: a novel algorithm for finding prophages  
780 in bacterial genomes that combines similarity- and composition-based strategies.  
781 *Nucleic Acids Res* **40**: e126.
- 782 Alcoforado Diniz J., Liu Y.C. & Coulthurst S.J. (2015). Molecular weaponry: diverse effectors  
783 delivered by the Type VI secretion system. *Cellular Microbiology* **17**: 1742-1751.
- 784 Alic S., Naglic T., Llop P., Toplak N., Koren S., Ravnkar M. & Dreo T. (2015). Draft Genome  
785 Sequences of *Dickeya* sp. Isolates B16 (NIB Z 2098) and S1 (NIB Z 2099) Causing  
786 Soft Rot of *Phalaenopsis* Orchids. *Genome Announc* **3**.
- 787 Allen C., Reverchon S. & Robert-Baudouy J. (1989). Nucleotide sequence of the *Erwinia*  
788 *chrysanthemi* gene encoding 2-keto-3-deoxygluconate permease. *Gene* **83**: 233-241.
- 789 Alouf J.E. (2003). Molecular features of the cytolytic pore-forming bacterial protein toxins.  
790 *Folia Microbiol (Praha)* **48**: 5-16.
- 791 Altschul S.F., Gish W., Miller W., Myers E.W. & Lipman D.J. (1990). Basic local alignment  
792 search tool. *J Mol Biol* **215**: 403-410.

- 773 Anantharaman V. & Aravind L. (2003). Application of comparative genomics in the  
774 identification and analysis of novel families of membrane-associated receptors in  
775 bacteria. *BMC Genomics* **4**: 34.
- 776 Aoki S.K., Diner E.J., de Roodenbeke C.T., Burgess B.R., Poole S.J., Braaten B.A., Jones  
777 A.M., Webb J.S., Hayes C.S., Cotter P.A. & Low D.A. (2010). A widespread family of  
778 polymorphic contact-dependent toxin delivery systems in bacteria. *Nature* **468**: 439-  
779 442.
- 780 Aznar A., Patrit O., Berger A. & Dellagi A. (2015). Alterations of iron distribution in  
781 Arabidopsis tissues infected by *Dickeya dadantii*. *Mol Plant Pathol* **16**: 521-528.
- 782 Barras F., van Gijsegem F.d.r. & Chatterjee A.K. (1994). Extracellular enzymes and  
783 pathogenesis of soft-rot *Erwinia*. *Annual review of phytopathology* **32**: 201-234.
- 784 Basler M. (2015). Type VI secretion system: secretion by a contractile nanomachine. *Philos*  
785 *Trans R Soc Lond B Biol Sci* **370**.
- 786 Baum L.E. & Petrie T. (1966). Statistical inference for probabilistic functions of finite state  
787 Markov chains. *The annals of mathematical statistics* **37**: 1554-1563.
- 788 Bellieny-Rabelo D., de Oliveira E.A.G., da Silva Ribeiro E., Costa E.P., Oliveira A.E.A. &  
789 Venancio T.M. (2016). Transcriptome analysis uncovers key regulatory and  
790 metabolic aspects of soybean embryonic axes during germination. *Scientific Reports*  
791 **6**.
- 792 Benjamini Y. & Yekutieli D. (2005). False discovery rate–adjusted multiple confidence  
793 intervals for selected parameters. *Journal of the American Statistical Association*  
794 **100**: 71-81.
- 795 Berg H.C. (1975). Chemotaxis in bacteria. *Annu Rev Biophys Bioeng* **4**: 119-136.
- 796 Bernal P., Llamas M.A. & Filloux A. (2018). Type VI secretion systems in plant-associated  
797 bacteria. *Environmental Microbiology* **20**: 1-15.
- 798 Bolger A.M., Lohse M. & Usadel B. (2014). Trimmomatic: a flexible trimmer for Illumina  
799 sequence data. *Bioinformatics* **30**: 2114-2120.

- 800 Carbon S., Ireland A., Mungall C.J., Shu S., Marshall B., Lewis S., Ami G.O.H. & Web  
801 Presence Working G. (2009). AmiGO: online access to ontology and annotation data.  
802 *Bioinformatics* **25**: 288-289.
- 803 Carpita N.C. & Gibeaut D.M. (1993). Structural models of primary cell walls in flowering  
804 plants: consistency of molecular structure with the physical properties of the walls  
805 during growth. *Plant J* **3**: 1-30.
- 806 Collins R.F., Beis K., Dong C., Botting C.H., McDonnell C., Ford R.C., Clarke B.R., Whitfield  
807 C. & Naismith J.H. (2007). The 3D structure of a periplasm-spanning platform  
808 required for assembly of group 1 capsular polysaccharides in Escherichia coli.  
809 *Proceedings of the National Academy of Sciences of the United States of America*  
810 **104**: 2390-2395.
- 811 Costerton J.W., Stewart P.S. & Greenberg E.P. (1999). Bacterial biofilms: a common cause  
812 of persistent infections. *Science* **284**: 1318-1322.
- 813 Daniels C., Vindurampulle C. & Morona R. (1998). Overexpression and topology of the  
814 Shigella flexneri O-antigen polymerase (Rfc/Wzy). *Mol Microbiol* **28**: 1211-1222.
- 815 Drummelsmith J. & Whitfield C. (1999). Gene products required for surface expression of the  
816 capsular form of the group 1 K antigen in Escherichia coli (O9a:K30). *Mol Microbiol*  
817 **31**: 1321-1332.
- 818 Duarte V., de Boer S.H., Ward L.J. & de Oliveira A.M. (2004). Characterization of atypical  
819 Erwinia carotovora strains causing blackleg of potato in Brazil. *J Appl Microbiol* **96**:  
820 535-545.
- 821 Duquesne S., Destoumieux-Garzón D., Peduzzi J. & Rebuffat S. (2007a). Microcins, gene-  
822 encoded antibacterial peptides from enterobacteria. *Natural product reports* **24**: 708-  
823 734.
- 824 Duquesne S., Petit V., Peduzzi J. & Rebuffat S. (2007b). Structural and functional diversity  
825 of microcins, gene-encoded antibacterial peptides from enterobacteria. *Journal of*  
826 *molecular microbiology and biotechnology* **13**: 200-209.

- 827 Durand E., Cambillau C., Cascales E. & Journet L. (2014). VgrG, Tae, Tle, and beyond: the  
828 versatile arsenal of Type VI secretion effectors. *Trends Microbiol* **22**: 498-507.
- 829 Durrant A. (2016). Antimicrobial production by *Pectobacterium carotovorum* subspecies  
830 brasiliensis and its role in competitive fitness of the potato pathogen. In.: Lincoln  
831 University, pp.
- 832 Eddy S.R. (1998). Profile hidden Markov models. *Bioinformatics* **14**: 755-763.
- 833 Eddy S.R. (2009). A new generation of homology search tools based on probabilistic  
834 inference. *Genome Inform* **23**: 205-211.
- 835 Eddy S.R. (2011). Accelerated Profile HMM Searches. *PLoS Comput Biol* **7**: e1002195.
- 836 Emanuelsson O., Brunak S., Von Heijne G. & Nielsen H. (2007). Locating proteins in the cell  
837 using TargetP, SignalP and related tools. *Nature protocols* **2**: 953.
- 838 Esnault E., Valens M., Espeli O. & Boccard F. (2007). Chromosome structuring limits  
839 genome plasticity in *Escherichia coli*. *PLoS Genet* **3**: e226.
- 840 Evans T.J., Coulthurst S.J., Komitopoulou E. & Salmond G.P. (2010). Two mobile  
841 *Pectobacterium atrosepticum* prophages modulate virulence. *FEMS Microbiol Lett*  
842 **304**: 195-202.
- 843 Ferrieres L., Aslam S.N., Cooper R.M. & Clarke D.J. (2007). The yjbEFGH locus in  
844 *Escherichia coli* K-12 is an operon encoding proteins involved in exopolysaccharide  
845 production. *Microbiology* **153**: 1070-1080.
- 846 Finn R.D., Mistry J., Tate J., Coggill P., Heger A., Pollington J.E., Gavin O.L., Gunasekaran  
847 P., Ceric G., Forslund K., Holm L., Sonnhammer E.L., Eddy S.R. & Bateman A.  
848 (2010). The Pfam protein families database. *Nucleic Acids Res* **38**: D211-222.
- 849 Frank K. & Sippl M.J. (2008). High-performance signal peptide prediction based on  
850 sequence alignment techniques. *Bioinformatics* **24**: 2172-2176.
- 851 Gabriel D.W., Allen C., Schell M., Denny T.P., Greenberg J.T., Duan Y.P., Flores-Cruz Z.,  
852 Huang Q., Clifford J.M. & Presting G. (2006). Identification of open reading frames  
853 unique to a select agent: *Ralstonia solanacearum* race 3 biovar 2. *Molecular Plant-  
854 Microbe Interactions* **19**: 69-79.



- 855 Gao L., Tu Z.J., Millett B.P. & Bradeen J.M. (2013). Insights into organ-specific pathogen  
856 defense responses in plants: RNA-seq analysis of potato tuber-*Phytophthora*  
857 *infestans* interactions. *BMC genomics* **14**: 340.
- 858 Geer L.Y., Domrachev M., Lipman D.J. & Bryant S.H. (2002). CDART: protein homology by  
859 domain architecture. *Genome Res* **12**: 1619-1623.
- 860 Genin S. & Denny T.P. (2012). Pathogenomics of the *Ralstonia solanacearum* species  
861 complex. *Annu Rev Phytopathol* **50**: 67-89.
- 862 Gossani C., Bellieny-Rabelo D. & Venancio T.M. (2014). Evolutionary analysis of multidrug  
863 resistance genes in fungi—impact of gene duplication and family conservation. *FEBS*  
864 *journal* **281**: 4967-4977.
- 865 Guidot A., Coupat B., Fall S., Prior P. & Bertolla F. (2009). Horizontal gene transfer between  
866 *Ralstonia solanacearum* strains detected by comparative genomic hybridization on  
867 microarrays. *The ISME journal* **3**: 549.
- 868 Guidot A., Prior P., Schoenfeld J., Carrere S., Genin S. & Boucher C. (2007). Genomic  
869 structure and phylogeny of the plant pathogen *Ralstonia solanacearum* inferred from  
870 gene distribution analysis. *J Bacteriol* **189**: 377-387.
- 871 Hayes C.S., Aoki S.K. & Low D.A. (2010). Bacterial contact-dependent delivery systems.  
872 *Annu Rev Genet* **44**: 71-90.
- 873 Hofmann K. (1993). TMbase-A database of membrane spanning proteins segments. *Biol.*  
874 *Chem. Hoppe-Seyler* **374**: 166.
- 875 Holland I.B., Schmitt L. & Young J. (2005). Type 1 protein secretion in bacteria, the ABC-  
876 transporter dependent pathway (review). *Mol Membr Biol* **22**: 29-39.
- 877 Islam S.T. & Lam J.S. (2013). Wzx flippase-mediated membrane translocation of sugar  
878 polymer precursors in bacteria. *Environ Microbiol* **15**: 1001-1015.
- 879 Islam S.T. & Lam J.S. (2014). Synthesis of bacterial polysaccharides via the Wzx/Wzy-  
880 dependent pathway. *Can J Microbiol* **60**: 697-716.

- 881 Jacobs J.M., Babujee L., Meng F., Milling A. & Allen C. (2012). The in planta transcriptome  
882 of *Ralstonia solanacearum*: conserved physiological and virulence strategies during  
883 bacterial wilt of tomato. *MBio* **3**: e00114-00112.
- 884 Jiang F., Wang X., Wang B., Chen L., Zhao Z., Waterfield N.R., Yang G. & Jin Q. (2016).  
885 The *Pseudomonas aeruginosa* type VI secretion PGAP1-like effector induces host  
886 autophagy by activating endoplasmic reticulum stress. *Cell reports* **16**: 1502-1509.
- 887 Kanonenberg K., Schwarz C.K. & Schmitt L. (2013). Type I secretion systems—a story of  
888 appendices. *Research in microbiology* **164**: 596-604.
- 889 Kao C.C. & Sequeira L. (1991). A gene cluster required for coordinated biosynthesis of  
890 lipopolysaccharide and extracellular polysaccharide also affects virulence of  
891 *Pseudomonas solanacearum*. *Journal of bacteriology* **173**: 7841-7847.
- 892 Kim D., Langmead B. & Salzberg S.L. (2015). HISAT: a fast spliced aligner with low memory  
893 requirements. *Nat Methods* **12**: 357-360.
- 894 Kim T.H., Sebastian S., Pinkham J.T., Ross R.A., Blalock L.T. & Kasper D.L. (2010).  
895 Characterization of the O-antigen polymerase (Wzy) of *Francisella tularensis*. *J Biol*  
896 *Chem* **285**: 27839-27849.
- 897 Koskiniemi S., Lamoureux J.G., Nikolakakis K.C., t'Kint de Roodenbeke C., Kaplan M.D.,  
898 Low D.A. & Hayes C.S. (2013). Rhs proteins from diverse bacteria mediate  
899 intercellular competition. *Proceedings of the National Academy of Sciences of the*  
900 *United States of America* **110**: 7032-7037.
- 901 Krzywinski M., Schein J., Birol I., Connors J., Gascoyne R., Horsman D., Jones S.J. & Marra  
902 M.A. (2009). Circos: an information aesthetic for comparative genomics. *Genome*  
903 *Res* **19**: 1639-1645.
- 904 Kubheka G.C., Coutinho T.A., Moleleki N. & Moleleki L.N. (2013). Colonization patterns of  
905 an mCherry-tagged *Pectobacterium carotovorum* subsp. *brasiliense* strain in potato  
906 plants. *Phytopathology* **103**: 1268-1279.

- 907 Kwenda S., Gorshkov V., Ramesh A.M., Naidoo S., Rubagotti E., Birch P.R. & Moleleki L.N.  
908 (2016). Discovery and profiling of small RNAs responsive to stress conditions in the  
909 plant pathogen *Pectobacterium atrosepticum*. *BMC Genomics* **17**: 47.
- 910 Lehrer J., Vigeant K.A., Tatar L.D. & Valvano M.A. (2007). Functional characterization and  
911 membrane topology of *Escherichia coli* WecA, a sugar-phosphate transferase  
912 initiating the biosynthesis of enterobacterial common antigen and O-antigen  
913 lipopolysaccharide. *J Bacteriol* **189**: 2618-2628.
- 914 Li L., Stoeckert C.J., Jr. & Roos D.S. (2003). OrthoMCL: identification of ortholog groups for  
915 eukaryotic genomes. *Genome Res* **13**: 2178-2189.
- 916 Li X.S., Yuan K.X., Cullis J., Levesque C.A., Chen W., Lewis C.T. & De Boer S.H. (2015).  
917 Draft Genome Sequences for Canadian Isolates of *Pectobacterium carotovorum*  
918 subsp. *brasiliense* with Weak Virulence on Potato. *Genome Announc* **3**.
- 919 Liao Y., Smyth G.K. & Shi W. (2014). featureCounts: an efficient general purpose program  
920 for assigning sequence reads to genomic features. *Bioinformatics* **30**: 923-930.
- 921 Liu H., Coulthurst S.J., Pritchard L., Hedley P.E., Ravensdale M., Humphris S., Burr T.,  
922 Takle G., Brurberg M.B., Birch P.R., Salmond G.P. & Toth I.K. (2008). Quorum  
923 sensing coordinates brute force and stealth modes of infection in the plant pathogen  
924 *Pectobacterium atrosepticum*. *PLoS Pathog* **4**: e1000093.
- 925 Marquez-Villavicencio M.d.P., Groves R.L. & Charkowski A.O. (2011). Soft rot disease  
926 severity is affected by potato physiology and *Pectobacterium* taxa. *Plant Disease* **95**:  
927 232-241.
- 928 Moleleki L.N., Pretorius R.G., Tanui C.K., Mosina G. & Theron J. (2017). A quorum sensing-  
929 defective mutant of *Pectobacterium carotovorum* ssp. *brasiliense* 1692 is attenuated  
930 in virulence and unable to occlude xylem tissue of susceptible potato plant stems.  
931 *Mol Plant Pathol* **18**: 32-44.
- 932 Moller S., Croning M.D. & Apweiler R. (2001). Evaluation of methods for the prediction of  
933 membrane spanning regions. *Bioinformatics* **17**: 646-653.

- 934 Mushegian A.R., Fullner K.J., Koonin E.V. & Nester E.W. (1996). A family of lysozyme-like  
935 virulence factors in bacterial pathogens of plants and animals. *Proceedings of the*  
936 *National Academy of Sciences of the United States of America* **93**: 7321-7326.
- 937 Ochman H., Lawrence J.G. & Groisman E.A. (2000). Lateral gene transfer and the nature of  
938 bacterial innovation. *Nature* **405**: 299-304.
- 939 Onkendi E.M., Ramesh A.M., Kwenda S., Naidoo S. & Moleleki L. (2016). Draft Genome  
940 Sequence of a Virulent *Pectobacterium carotovorum* subsp. *brasiliense* Isolate  
941 Causing Soft Rot of Cucumber. *Genome Announc* **4**.
- 942 Overbeek R., Fonstein M., D'souza M., Pusch G.D. & Maltsev N. (1999). The use of gene  
943 clusters to infer functional coupling. *Proceedings of the National Academy of*  
944 *Sciences* **96**: 2896-2901.
- 945 Panda P., Lu A., Armstrong K.F. & Pitman A.R. (2015). Draft Genome Sequence for ICMP  
946 5702, the Type Strain of *Pectobacterium carotovorum* subsp. *carotovorum* That  
947 Causes Soft Rot Disease on Potato. *Genome Announc* **3**.
- 948 Pedron J., Chapelle E., Alunni B. & Van Gijsegem F. (2017). Transcriptome analysis of the  
949 *Dickeya dadantii* PecS regulon during the early stages of interaction with *Arabidopsis*  
950 *thaliana*. *Mol Plant Pathol*.
- 951 Peleg A., Shifrin Y., Ilan O., Nadler-Yona C., Nov S., Koby S., Baruch K., Altuvia S.,  
952 Elgrably-Weiss M., Abe C.M., Knutton S., Saper M.A. & Rosenshine I. (2005).  
953 Identification of an *Escherichia coli* operon required for formation of the O-antigen  
954 capsule. *J Bacteriol* **187**: 5259-5266.
- 955 Perez-Llamas C. & Lopez-Bigas N. (2011). Gitoools: analysis and visualisation of genomic  
956 data using interactive heat-maps. *PloS one* **6**: e19541.
- 957 Perna N.T., Plunkett G., 3rd, Burland V., Mau B., Glasner J.D., Rose D.J., Mayhew G.F.,  
958 Evans P.S., Gregor J., Kirkpatrick H.A., Posfai G., Hackett J., Klink S., Boutin A.,  
959 Shao Y., Miller L., Grotbeck E.J., Davis N.W., Lim A., Dimalanta E.T., Potamousis  
960 K.D., Apodaca J., Anantharaman T.S., Lin J., Yen G., Schwartz D.C., Welch R.A. &

- 961 Blattner F.R. (2001). Genome sequence of enterohaemorrhagic *Escherichia coli*  
962 O157:H7. *Nature* **409**: 529-533.
- 963 Pérombelon M. (2002). Potato diseases caused by soft rot erwinias: an overview of  
964 pathogenesis. *Plant Pathology* **51**: 1-12.
- 965 Pukatzki S., Ma A.T., Revel A.T., Sturtevant D. & Mekalanos J.J. (2007). Type VI secretion  
966 system translocates a phage tail spike-like protein into target cells where it cross-  
967 links actin. *Proceedings of the National Academy of Sciences of the United States of*  
968 *America* **104**: 15508-15513.
- 969 Pukatzki S., Ma A.T., Sturtevant D., Krastins B., Sarracino D., Nelson W.C., Heidelberg J.F.  
970 & Mekalanos J.J. (2006). Identification of a conserved bacterial protein secretion  
971 system in *Vibrio cholerae* using the *Dictyostelium* host model system. *Proceedings of*  
972 *the National Academy of Sciences of the United States of America* **103**: 1528-1533.
- 973 Rahn A. & Whitfield C. (2003). Transcriptional organization and regulation of the *Escherichia*  
974 *coli* K30 group 1 capsule biosynthesis (*cps*) gene cluster. *Mol Microbiol* **47**: 1045-  
975 1060.
- 976 Raoul des Essarts Y., Mondy S., Helias V. & Faure D. (2015). Genome Sequence of the  
977 Potato Plant Pathogen *Dickeya dianthicola* Strain RNS04.9. *Genome Announc* **3**.
- 978 Reeve J.N. & Shaw J.E. (1979). Lambda encodes an outer membrane protein: the *lom* gene.  
979 *Mol Gen Genet* **172**: 243-248.
- 980 Regue M., Climent N., Abitiu N., Coderch N., Merino S., Izquierdo L., Altarriba M. & Tomas  
981 J.M. (2001). Genetic characterization of the *Klebsiella pneumoniae* *waa* gene cluster,  
982 involved in core lipopolysaccharide biosynthesis. *J Bacteriol* **183**: 3564-3573.
- 983 Remmert M., Biegert A., Hauser A. & Soding J. (2011). HHblits: lightning-fast iterative  
984 protein sequence searching by HMM-HMM alignment. *Nat Methods* **9**: 173-175.
- 985 Remmert M., Linke D., Lupas A.N. & Soding J. (2009). HHomp--prediction and classification  
986 of outer membrane proteins. *Nucleic Acids Res* **37**: W446-451.

- 987 Rendueles O., Garcia-Garcera M., Neron B., Touchon M. & Rocha E.P.C. (2017).  
988 Abundance and co-occurrence of extracellular capsules increase environmental  
989 breadth: Implications for the emergence of pathogens. *PLoS Pathog* **13**: e1006525.
- 990 Robinson M.D., McCarthy D.J. & Smyth G.K. (2010). edgeR: a Bioconductor package for  
991 differential expression analysis of digital gene expression data. *Bioinformatics* **26**:  
992 139-140.
- 993 Rocchetta H.L., Burrows L.L. & Lam J.S. (1999). Genetics of O-antigen biosynthesis in  
994 *Pseudomonas aeruginosa*. *Microbiol Mol Biol Rev* **63**: 523-553.
- 995 Ruhe Z.C., Low D.A. & Hayes C.S. (2013). Bacterial contact-dependent growth inhibition.  
996 *Trends Microbiol* **21**: 230-237.
- 997 Russell A.B., Hood R.D., Bui N.K., LeRoux M., Vollmer W. & Mougous J.D. (2011). Type VI  
998 secretion delivers bacteriolytic effectors to target cells. *Nature* **475**: 343-347.
- 999 Sabatti C., Rohlin L., Oh M.K. & Liao J.C. (2002). Co-expression pattern from DNA  
1000 microarray experiments as a tool for operon prediction. *Nucleic Acids Res* **30**: 2886-  
1001 2893.
- 1002 Sathiyamoorthy K., Mills E., Franzmann T.M., Rosenshine I. & Saper M.A. (2011). The  
1003 crystal structure of Escherichia coli group 4 capsule protein GfcC reveals a domain  
1004 organization resembling that of Wza. *Biochemistry* **50**: 5465-5476.
- 1005 Schmid J., Sieber V. & Rehm B. (2015). Bacterial exopolysaccharides: biosynthesis  
1006 pathways and engineering strategies. *Frontiers in microbiology* **6**: 496.
- 1007 Shneider M.M., Buth S.A., Ho B.T., Basler M., Mekalanos J.J. & Leiman P.G. (2013). PAAR-  
1008 repeat proteins sharpen and diversify the type VI secretion system spike. *Nature* **500**:  
1009 350-353.
- 1010 Shub D.A., Goodrich-Blair H. & Eddy S.R. (1994). Amino acid sequence motif of group I  
1011 intron endonucleases is conserved in open reading frames of group II introns. *Trends*  
1012 *in biochemical sciences* **19**: 402-404.
- 1013 Sievers F. & Higgins D.G. (2018). Clustal Omega for making accurate alignments of many  
1014 protein sequences. *Protein Sci* **27**: 135-145.

- 1015 Summer E.J., Gonzalez C.F., Carlisle T., Mebane L.M., Cass A.M., Savva C.G., LiPuma J. &  
1016 Young R. (2004). Burkholderia cenocepacia phage BcepMu and a family of Mu-like  
1017 phages encoding potential pathogenesis factors. *J Mol Biol* **340**: 49-65.
- 1018 Tamames J., Casari G., Ouzounis C. & Valencia A. (1997). Conserved clusters of  
1019 functionally related genes in two bacterial genomes. *J Mol Evol* **44**: 66-73.
- 1020 Tanui C.K., Shyntum D.Y., Priem S.L., Theron J. & Moleleki L.N. (2017). Influence of the  
1021 ferric uptake regulator (Fur) protein on pathogenicity in *Pectobacterium carotovorum*  
1022 subsp. brasiliense. *PLoS One* **12**: e0177647.
- 1023 Toth I., Thorpe C., Bentley S., Mulholland V., Hyman L., Perombelon M. & Salmond G.  
1024 (1999). Mutation in a gene required for lipopolysaccharide and enterobacterial  
1025 common antigen biosynthesis affects virulence in the plant pathogen *Erwinia*  
1026 *carotovora* subsp. *atroseptica*. *Molecular plant-microbe interactions* **12**: 499-507.
- 1027 Toth I.K., Bell K.S., Holeva M.C. & Birch P.R. (2003). Soft rot erwiniae: from genes to  
1028 genomes. *Mol Plant Pathol* **4**: 17-30.
- 1029 Toth I.K. & Birch P.R. (2005). Rotting softly and stealthily. *Curr Opin Plant Biol* **8**: 424-429.
- 1030 Touchon M. & Rocha E.P. (2016). Coevolution of the Organization and Structure of  
1031 Prokaryotic Genomes. *Cold Spring Harb Perspect Biol* **8**: a018168.
- 1032 Vaca-Pacheco S., Paniagua-Contreras G.L., Garcia-Gonzalez O. & de la Garza M. (1999).  
1033 The clinically isolated FIZ15 bacteriophage causes lysogenic conversion in  
1034 *Pseudomonas aeruginosa* PAO1. *Curr Microbiol* **38**: 239-243.
- 1035 Valvano M.A. (2003). Export of O-specific lipopolysaccharide. *Front Biosci* **8**: s452-471.
- 1036 Varani A.M., Monteiro-Vitorello C.B., Nakaya H.I. & Van Sluys M.A. (2013). The role of  
1037 prophage in plant-pathogenic bacteria. *Annu Rev Phytopathol* **51**: 429-451.
- 1038 von Mering C., Jensen L.J., Snel B., Hooper S.D., Krupp M., Foglierini M., Jouffre N.,  
1039 Huynen M.A. & Bork P. (2005). STRING: known and predicted protein-protein  
1040 associations, integrated and transferred across organisms. *Nucleic Acids Res* **33**:  
1041 D433-437.

- 1042 Wang L., Liu D. & Reeves P.R. (1996). C-terminal half of Salmonella enterica WbaP (RfbP)  
1043 is the galactosyl-1-phosphate transferase domain catalyzing the first step of O-  
1044 antigen synthesis. *Journal of Bacteriology* **178**: 2598-2604.
- 1045 Wang Y., Tang H., Debarry J.D., Tan X., Li J., Wang X., Lee T.H., Jin H., Marler B., Guo H.,  
1046 Kissinger J.C. & Paterson A.H. (2012). MCScanX: a toolkit for detection and  
1047 evolutionary analysis of gene synteny and collinearity. *Nucleic Acids Res* **40**: e49.
- 1048 Whitfield C. (2006). Biosynthesis and assembly of capsular polysaccharides in Escherichia  
1049 coli. *Annu Rev Biochem* **75**: 39-68.
- 1050 Yamada K., Hirota M., Niimi Y., Nguyen H.A., Takahara Y., Kamio Y. & Kaneko J. (2006).  
1051 Nucleotide sequences and organization of the genes for carotovoricin (Ctv) from  
1052 Erwinia carotovora indicate that Ctv evolved from the same ancestor as Salmonella  
1053 typhi prophage. *Biosci Biotechnol Biochem* **70**: 2236-2247.
- 1054 Yin Y., Zhang H., Olman V. & Xu Y. (2010). Genomic arrangement of bacterial operons is  
1055 constrained by biological pathways encoded in the genome. *Proceedings of the*  
1056 *National Academy of Sciences* **107**: 6310-6315.
- 1057 Zhang D., Iyer L.M. & Aravind L. (2011). A novel immunity system for bacterial nucleic acid  
1058 degrading toxins and its recruitment in various eukaryotic and DNA viral systems.  
1059 *Nucleic Acids Res* **39**: 4532-4552.
- 1060 Zhao G., Wu B., Li L. & Wang P.G. (2014). O-antigen polymerase adopts a distributive  
1061 mechanism for lipopolysaccharide biosynthesis. *Appl Microbiol Biotechnol* **98**: 4075-  
1062 4081.
- 1063 Zhou W., Forouhar F., Seetharaman J., Chen C.X., Cunningham K., Ma L.-C., Janjua H.,  
1064 Xiao R., Baran M.C., Acton T.B., Montelione G.T., Tong L., Hunt J.F. & (NESG)  
1065 N.S.G.C. (2006). Crystal Structure of the hypothetical lipoprotein YmcC from  
1066 Escherichia coli (K12), Northeast Structural Genomics target ER552. In. RCSB PDB,  
1067 pp.
- 1068 Zhou Y., Liang Y., Lynch K.H., Dennis J.J. & Wishart D.S. (2011). PHAST: a fast phage  
1069 search tool. *Nucleic Acids Res* **39**: W347-352.



1070

1071 **9. Tables**

| Sample*         | Unmapped Reads | Multiple Matches | Uniquely Mapped Reads | % Uniquely Mapped | Total Mapped reads | % Total Mapped | Raw Reads Inputs |
|-----------------|----------------|------------------|-----------------------|-------------------|--------------------|----------------|------------------|
| <i>Cwt</i>      | 751 568        | 416 981          | 13 835 241            | 97,07             | 14 252 222         | 95,0           | 15 003 790       |
| <i>Wt-24hpi</i> | 1 856 371      | 555 623          | 18 131 044            | 97,03             | 18 686 667         | 91,0           | 20 543 037       |
| <i>Wt-72hpi</i> | 2 852 242      | 333 569          | 11 124 857            | 97,09             | 11 458 426         | 80,1           | 14 310 667       |

\* Experimental samples are abbreviated as follows: Cwt - *in vitro* control wild-type; Wt-24hpi - wild-type 24 hours post infection; Wt-72hpi - wild-type 72 hours post-infection

1072

1073

1074 **10. Figure Legends**

1075 **Figure 1 – Transcriptional variation *in planta* of T6SS-related genes in *Pcb* 1692 and**  
 1076 **linkage between the endonuclease WHH and HSI in SRE genomes: (A)** Each row on the  
 1077 heatmap represents a gene labeled after its (i) respective encoded-protein name, (ii)  
 1078 functional domain or (iii) locus-tag respectively given the annotation availability. The two  
 1079 columns of the heatmaps represent pairwise comparisons between samples, thus each cell  
 1080 shows the variation in transcription found in each comparison illustrated by a color-scale  
 1081 ranging from -5 (dark-grey) to 5 (red) representing the log<sub>2</sub>fold-change variation in  
 1082 expression. Column labels are abbreviated as follows: Cwt = Control wild-type; Wt-24hpi/Wt-  
 1083 72hpi = wild-type 24/72 hours post-infection in potato tubers. Four segments in the heatmap  
 1084 separate T6SS-related clusters - type VI secretion (Tss) and Hcp secretion island (HSI) -  
 1085 located in different genomic regions, namely: Tss+HSI-1, HSI-2, -3 and -4. **(B)** Gene  
 1086 neighborhood of WHH-SMI1\_KNR4 duplets in the 10 SRE strains conserved within HSIs.  
 1087 Each gene arrangement is associated with its respective strain(s) represented on the left  
 1088 side by 4-letters abbreviations as follows: *Dzea* (*Dickeya zea*), *Pcb* (*Pectobacterium*  
 1089 *carotovorum* subsp. *brasiliense*), *Ddad* (*Dickeya dadantii*), *Pbet* (*Pectobacterium*  
 1090 *betavasculorum*), *Dchr* (*Dickeya chrysanthemi*). For each species, the respective number of  
 1091 strains conserving that particular gene arrangement are represented in grey ellipses on their  
 1092 left. The WHH-SMI1\_KNR4 duplets (Pfam: PF14414; PF09346 respectively) are highlighted  
 1093 in light-blue. Hcp (T6SS\_HCP; Pfam: PF05638), VgrG (Phage\_GPD; Pfam: PF05954) and  
 1094 PAAR (PAAR\_motif; Pfam: PF05488) encoding genes are highlighted in dark-blue.

1095 Syntenically conserved blocks across the different gene arrangements are linked by light-  
1096 brown areas. Duplicated genes in a single arrangement are linked by green shapes.  
1097 Successfully clustered products in orthologous-groups for which no conserved domains were  
1098 detected are highlighted in dark-blue font.

1099

1100 **Figure 2 – Growth of *E. coli* DH5-alpha expressing effectors from pCH450 induced**  
1101 **with 0.2% L-arabinose after 30 min growth, or both effector and immunity protein from**  
1102 **pCH450 and pTrc100, respectively. (A)** Expression of AHH nuclease decreases the growth  
1103 rate of *E. coli*, but not as pronounced as the positive control RhsA from *D. dadantii*  
1104 (Koskiniemi *et al.*, 2013). Expression of both AHH and its immunity protein Ai (AHH +i)  
1105 negate toxic effects of the effector alone, however after extended periods displays growth  
1106 inhibition due to protein overexpression. **(B)** Expression of phospholipase, WHH nuclease,  
1107 and D123 effectors grows comparable to the empty vector control (p450), indicating that  
1108 individual expression of these effectors does not contribute towards bacterial killing in the  
1109 condition analyzed.

1110

1111 **Figure 3 – Transcriptional variation in *Pcb* 1692 and genomic range of Carotovoricin**  
1112 **(Ctv) and PcbPr1 insertions in four *Pectobacterium* strains. (A)** The heatmaps show  
1113 transcriptional variation profiles of T1SS+Ctv block and serralysin/inhibitor genes (top) and  
1114 from a 7 kb segment of PcbPr1 (bottom). The heatmap is represented as in Figure 1. For Ctv  
1115 and PcbPr1, contig coordinates are represented in parenthesis immediately below labels,  
1116 which links to the item B of this panel. Genes are preferentially represented by the domain  
1117 architecture, or by the respective orthologous group (OG\_#). The “na” label is used if none of  
1118 the previous is applicable. Genes in red font are significantly up-regulated, whereas grey  
1119 indicates no support for regulation. **(B)** Ctv and PcbPr1 drastically contrasting degree of  
1120 conservation is represented in four selected *Pectobacterium* strains. Genomic regions from  
1121 *Pcc* strain PC1 (light-purple) and BCS2 (light-green), *Patr* strain SCRI1043 (light-orange),  
1122 and *Pcb* 1692 (light-blue) are represented in circular ideograms. The next two consecutive

1123 inner radiuses respectively represent the frequencies of Blastp (protein sequence similarity –  
1124 purple→green range) and MCSanX (syntenic conservation – red→blue range) pairwise hits  
1125 of each *Pcb* 1692 sequence compared to 99 SRE strains. The color-range key used in the  
1126 bars represents the frequency of positive hits found for each *Pcb* 1692 sequence: ≤ 30  
1127 (purple/red) or > 30 (green/blue). The links binding genomic regions represent the insertion  
1128 range of prophages for which conserved synteny could be detected (Ctv = orange; PcbPr1 =  
1129 pink). The green outer-radius adjacent to the ideograms represent the range of Blastp  
1130 similarity with the original Ctv described by Yamada *et al.* (2006). (Table S5) **(C)** Gene  
1131 neighborhood screening of T1SS+Ctv block: Functional groups are separated in: plant cell  
1132 wall degradation (PCWD - light-red), T1SS (blue) and Ctv (light-green) or unrelated to these  
1133 classes (grey). Each genomic organization found in *Pectobacterium* genomes is sided by the  
1134 species conserving a respective arrangement abbreviated as in Table S9. Each species is  
1135 sided by grey ellipses representing the respective number of strains harboring the particular  
1136 arrangement.

1137

1138 **Figure 4 – *In planta* transcriptional profile, genomic conservation and annotation of**  
1139 **dedicated polysaccharide clusters in *Pcb* 1692: (A)** Heatmap of GFC operon as  
1140 represented in Figure 1. Genes highlighted with red font are significantly up-regulated in at  
1141 least one interval. Asterisks next to the genes represent those for which no orthology  
1142 relationship could be assessed, which by extension are not represented in the network. Next  
1143 to each gene-name represented in the rows, horizontal bars (percentage-stacked) display  
1144 their respective conservation compared with SRE genomes of *Dickeya* (39 strains) and  
1145 *Pectobacterium* (60 strains) genera. These bars include overall frequencies of Blastp  
1146 (sequence similarity) and MCSanX (syntenic conservation) searches of *Pcb* 1692 gene  
1147 products against 99 SRE complete datasets. The bars are divided in segments: Syntenic  
1148 with *Dickeya spp.* (blue), Blastp positive against *Dickeya spp.* (red), Syntenic with  
1149 *Pectobacterium spp.* (grey), Blastp positive against *Pectobacterium spp.* (yellow). **(B)**  
1150 Correlational network denotes the annotated gene association between *Pcb* 1692

1151 successfully predicted orthologs in *E. coli* and *P. aeruginosa* according to STRING database  
1152 (von Mering *et al.*, 2005) also showing respective GO terms annotations. Thickness of  
1153 network links are proportional to the combined scores obtained from STRING algorithm,  
1154 which computes combined probabilities gleaned from different evidence sources listed in the  
1155 tabular output found in (Table S7) (von Mering *et al.*, 2005). Blue lines represent new co-  
1156 regulation evidence found in our transcriptome dataset between genes for which other  
1157 categories of associations are known. Those entries not annotated in the three major GO  
1158 terms shown in the network are highlighted in grey. **(C)** Transcriptional variation of *waa* (top)  
1159 and *wec* (bottom) gene clusters represented as in (A). Additionally, down-regulated genes  
1160 are highlighted in blue.

1161

1162 **Figure 5 – Schematic proposition of GFC machinery organization in *Pcb* 1692:** The  
1163 schematic view is based on the current model of Wza/Wzc polysaccharide exportation in  
1164 group 4 capsule biosynthesis (Whitfield, 2006). Cell structure representations are  
1165 abbreviated as follows: outer-membrane (OM), periplasm (Pp), inner-membrane (IM), and  
1166 cytoplasm (Cp). On top-right, the key-box show color assignments of known/unknown  
1167 protein functionalities using the following abbreviations: membrane-periplasmic auxiliary  
1168 protein (MPA), protein tyrosine phosphatase (PTP), outer-membrane auxiliary protein  
1169 (OMA). A binary table shows graphical representations for presence/true ('T') or  
1170 absence/false ('F') of six parameters analyzed in the sequences following these  
1171 abbreviations: transmembrane segments (TM), outer-membrane protein (OMP), available  
1172 3D structure (3DS), significant infection-induced up-regulation in *Pcb* 1692 (UR), low  
1173 conservation amongst SRE (detailed below) assessed by synteny and sequence similarity  
1174 (LC), genomic localization within the GFC region of *Pcb* 1692 (GFC-r). The number of  
1175 detected TMs is represented within the pink shape: with an asterisk if the prediction methods  
1176 diverge, or without asterisk if these methods converge in the number of TMs predicted. Low  
1177 conservation (LC) is attributed to sequences exhibiting respectively less than 40 and 70  
1178 positive protein sequence and syntenic hits compared to 100 SRE (see Table S7 for details).

1179 On top-left, the genomic organization of GFC region is depicted using the features described  
1180 in the top-right box. The arrows indicate the transcriptional orientation of the genes within the  
1181 region.  
1182



A

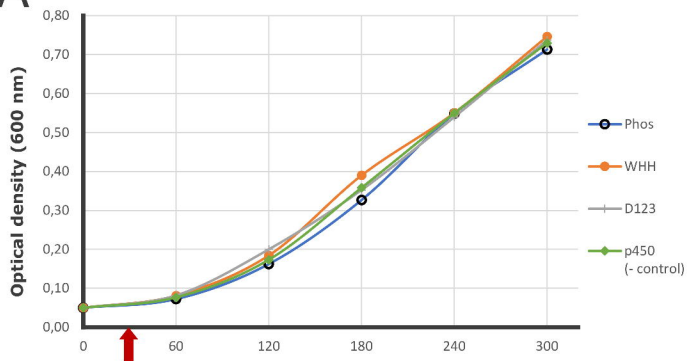

B

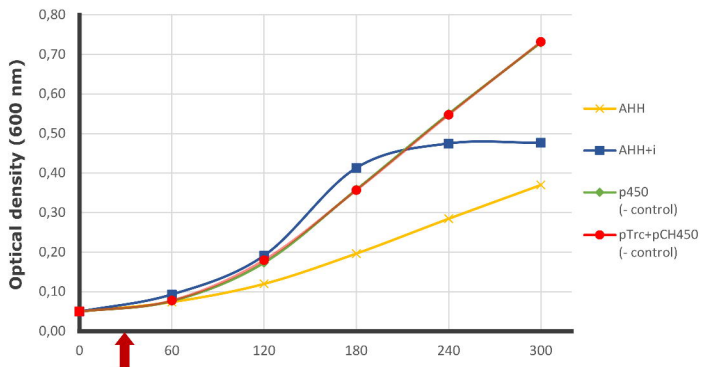

**A**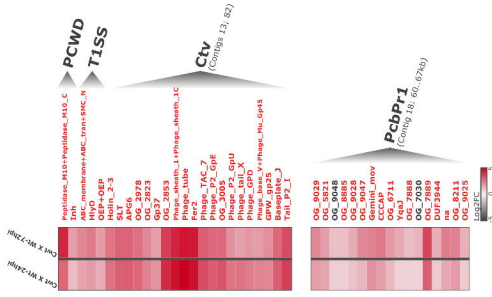**B**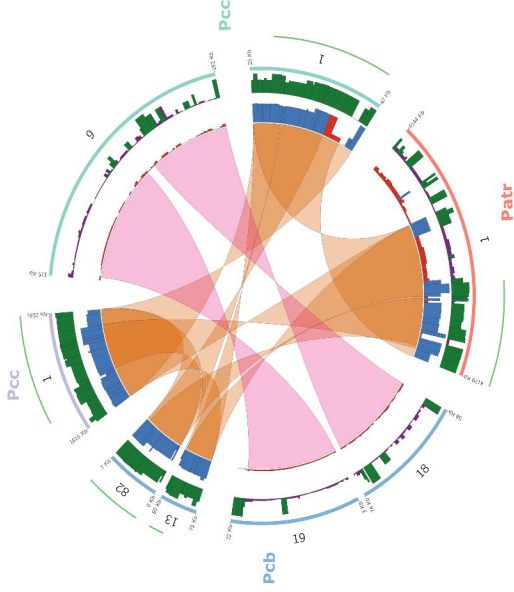**C**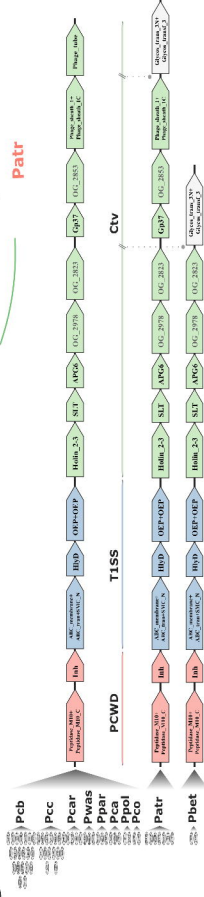



A

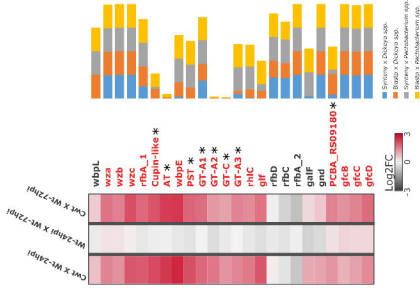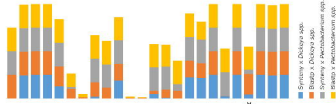

B

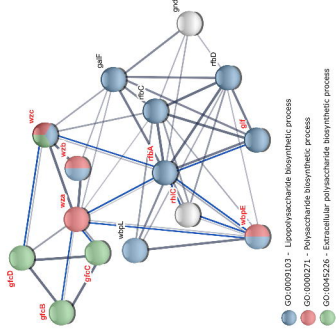

C

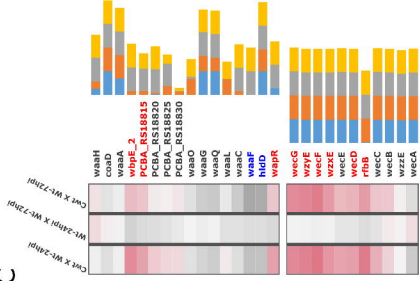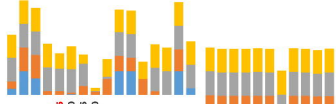

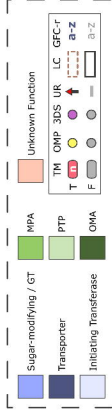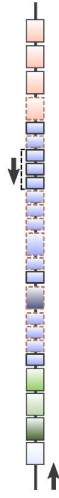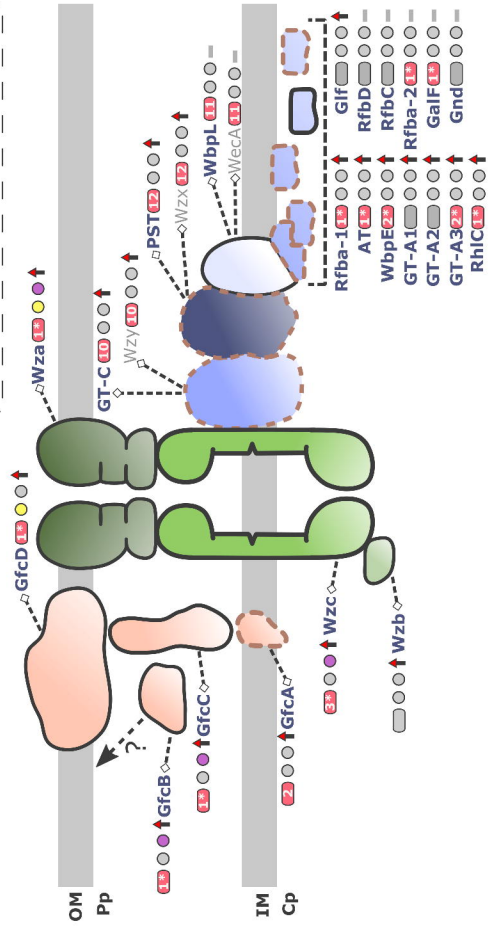

Source: http://biorxiv.org/content/10.1101/391854v1.full.pdf
